# Supplementary material for: Missed opportunities: childhood learning disabilities as early indicators of risk among homeless adults with mental illness in Vancouver, British Columbia
Source: PubMed Central journal article supplement — BMJ Open. 2012 Nov 22;2(6):e001586. doi: 10.1136/bmjopen-2012-001586 (PMC3533004; doi:10.1136/bmjopen-2012-001586), 2012-11-22
Supplement: bmjopen-2012-001586.draft_revisions.pdf [file bmjopen-2012-001586.draft_revisions.pdf]

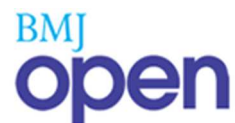

**Missed Opportunities: Childhood Learning Disabilities as Early Indicators of Risk among Homeless Adults with Mental Illness in Vancouver, British Columbia**

|                                 |                                                                                                                                                                                                                |
|---------------------------------|----------------------------------------------------------------------------------------------------------------------------------------------------------------------------------------------------------------|
| Journal:                        | <i>BMJ Open</i>                                                                                                                                                                                                |
| Manuscript ID:                  | bmjopen-2012-001586                                                                                                                                                                                            |
| Article Type:                   | Research                                                                                                                                                                                                       |
| Date Submitted by the Author:   | 01-Jun-2012                                                                                                                                                                                                    |
| Complete List of Authors:       | Patterson, Michelle; Simon Fraser University, Health Sciences<br>Moniruzzaman, Akm; Simon Fraser University,<br>Somers, Julian; Simon Fraser University,<br>Frankish, Charles; University of British Columbia, |
| <b>Primary Subject Heading</b>: | Mental health                                                                                                                                                                                                  |
| Secondary Subject Heading:      | Public health                                                                                                                                                                                                  |
| Keywords:                       | MENTAL HEALTH, Substance misuse < PSYCHIATRY, PSYCHIATRY, PUBLIC HEALTH                                                                                                                                        |
|                                 |                                                                                                                                                                                                                |

SCHOLARONE™  
Manuscripts

Learning problems and disabilities

## MANUSCRIPT COVER PAGE

**TITLE. Missed Opportunities: Childhood Learning Disabilities as Early Indicators of Risk among Homeless Adults with Mental Illness in Vancouver, British Columbia.**

### **AUTHORS:**

Michelle L. Patterson, PhD (corresponding author)  
Adjunct Professor  
Simon Fraser University  
Faculty of Health Sciences  
8888 University Drive, Blusson Hall Rm. 11010  
Burnaby, British Columbia  
V5A 1S6 Canada  
[michelle\\_patterson@sfu.ca](mailto:michelle_patterson@sfu.ca)  
Tel.: 778-782-5279

Akm Moniruzzaman, PhD  
Research Associate  
Simon Fraser University

Julian M. Somers, PhD  
Associate Professor  
Simon Fraser University

Charles J. Frankish, PhD  
Professor  
University of British Columbia  
School of Population and Public Health

**Key words:** homelessness, mental illness, learning disabilities

Learning problems and disabilities

## ABSTRACT

**Objectives.** It is well documented that early learning problems and poor academic achievement adversely impact child development and a wide range of adult outcomes; however, these indicators have received scant attention among homeless adults. This study examines self-reported learning disabilities in childhood as predictors of duration of homelessness, mental and substance use disorders, physical health, and service utilization in a sample of homeless adults with current mental illness.

**Design:** This study was conducted using the baseline sample from a randomized controlled trial.

**Setting:** Participants were sampled from the community in Vancouver, British Columbia.

**Participants:** The total sample included 497 adult participants who met criteria for absolute homelessness or precarious housing and a current mental disorder based on a structured diagnostic interview. Learning disabilities in childhood were assessed by asking adult participants whether they thought they had a learning disability in childhood and if anyone had told them they had a learning disability. Only participants who responded positively to both questions (n=133) were included in the analyses.

**Outcome measures.** Primary outcomes include current mental disorders, substance use disorders, physical health, service utilization and duration of homelessness.

**Results.** In multivariable regression models, self-reported learning disability during childhood independently predicted self-reported educational attainment and lifetime duration of homelessness as well as a range of mental health, physical health, and substance use problems, but did not predict reported health or justice service utilization.

**Conclusions.** Childhood learning problems are overrepresented among homeless adults

1 Learning problems and disabilities

2  
3 with complex comorbidities and long histories of homelessness. Our findings are  
4  
5 consistent with a growing body of literature indicating that adverse childhood events are  
6  
7  
8 potent risk factors for a number of adult health and psychiatric problems, including  
9  
10 substance abuse. Results are discussed in the context of cumulative adversity and  
11  
12 problem behaviour theory.  
13

14  
15 **Trials registration number:** This trial has been registered with the International  
16  
17 Standard Randomised Control Trial Number Register and assigned ISRCTN42520374.  
18  
19  
20  
21  
22  
23  
24  
25  
26  
27  
28  
29  
30  
31  
32  
33  
34  
35  
36  
37  
38  
39  
40  
41  
42  
43  
44  
45  
46  
47  
48  
49  
50  
51  
52  
53  
54  
55  
56  
57  
58  
59  
60

Learning problems and disabilities

## ARTICLE SUMMARY

### Article focus

- The relationship between self-reported learning disability in childhood as a predictor of adult homelessness and associated health and service use outcomes among a cohort of adult who are homeless and have a mental disorder.
- Primary outcomes include current mental disorders, substance use disorders, physical health, service utilization and duration of homelessness.
- How homelessness and the myriad of associated negative health and social outcomes might be prevented.

### Key messages

- Childhood learning disabilities are overrepresented among homeless adults with complex comorbidities and predict a range of poor health outcomes in adulthood including mood and anxiety disorders, suicidal ideation, early and severe substance use, and physical health problems.
- Early risk factors are often longstanding and drive a trajectory of cumulative risk, potentially leading to severe psychopathology and social exclusion.

### Strengths and limitations of this study

- Strengths include a large sample size, a diverse recruitment strategy, and structured diagnostic interviews for mental disorders.
- Limitations include retrospective, self-report of childhood learning disabilities.
- Lack of access to early trauma and family dysfunction variables as well as measures of general cognitive impairment at baseline.

Learning problems and disabilities

## INTRODUCTION

Efforts to prevent homelessness require an understanding of the underlying causes and early indicators of risk. Research into the causes of homelessness suggests complex interactions between structural and individual factors, both of which are often present long before the onset of first homelessness.[1-2] The childhoods of homeless adults are disproportionately characterized by persistent poverty, residential mobility, school problems, and other stressful and/or traumatic experiences[3-5] particularly among homeless individuals with severe mental illness.[2]

While a growing body of research has examined the relationship between adverse childhood events and subsequent homelessness,[3, 4] few studies have examined the role of childhood learning disabilities. There is growing evidence that academic problems in school foreshadow later educational and employment difficulties and may affect multiple domains of functioning.[6]

In Canada, educational policies fall under provincial jurisdiction, therefore, definitions of learning disabilities (LD) vary widely and include learning problems, difficulties, disorders, as well as “children at risk.”[7] LD are assumed to be neurological in origin and affect the acquisition, organization, retention, understanding or use of verbal and/or nonverbal information.[8] According to Statistics Canada, 4.9% of children aged 6 to 15 have a LD, varying from 1.6% for children aged 6 to 7.2% among 10-year-olds.[9]

While the consequences of LD on childhood academic and social development are well documented,[10, 11] the impact in adulthood is challenging to assess. However,

1 Learning problems and disabilities

2  
3 research suggests that LD often persist into adulthood and affect diverse aspects of  
4  
5 functioning including employment, social relationships, quality of life, and mental and  
6  
7 physical health.[12]  
8  
9

10 In school settings, LD typically manifest as poor academic achievement, which is  
11 associated with a greater number of school absences, suspensions, and grade retention as  
12 well as externalizing and internalizing behaviour problems.[7-10] Almost one-third of  
13 US adolescents with LD in the National Longitudinal Transition Study did not complete  
14 high school and were less likely to enroll in subsequent vocational or academic programs  
15 compared to their non-LD peers.[10]  
16  
17  
18  
19  
20  
21  
22  
23

24 Research examining substance abuse among youth with LD remains  
25 inconclusive.[13] Beitchman et al.[11] assessed 264 Canadian children for LD at ages 12  
26 and 19, and for psychiatric and substance use disorders at age 19. Children who met  
27 criteria for LD at ages 12 and 19 were more likely to develop a psychiatric or substance  
28 use disorder compared to non-LD children at both time points. LD at 19 years of age  
29 increased the risk for substance use disorder three-fold after controlling for behavioural  
30 problems and family structure. Difficulties with executive functioning, academic failure,  
31 low self-esteem, and poor social skills are viewed as the strongest predictors of substance  
32 use disorder.[14]  
33  
34  
35  
36  
37  
38  
39  
40  
41  
42  
43  
44

45 Compared to non-LD peers, youth with LD frequently report feelings of loneliness,  
46 stress, depression, and suicide, among other psychiatric symptoms.[15, 16] For example,  
47 in the National Longitudinal Study of Adolescent Health, the LD sample was twice as  
48 likely to report a suicide attempt in the past year.[16] Longitudinal research on risk-  
49 taking indicates that, compared to non-LD peers, adolescents with LD engage more  
50  
51  
52  
53  
54  
55  
56  
57  
58  
59  
60

1 Learning problems and disabilities

2  
3 frequently in various risk behaviours.[17] Therefore, the presence of LD in childhood  
4  
5 appears to confer a general risk for adverse outcomes throughout adolescence and into  
6  
7 adulthood.  
8  
9

10 In identifying early indicators for homelessness, we are posing a larger question  
11  
12 about how we might prevent homelessness and the myriad of associated negative health  
13  
14 and social outcomes. There has been a resurgence of interest in early intervention as a  
15  
16 means of preventing or attenuating a wide range of developmental outcomes in  
17  
18 adulthood.[18] In this study, we focus on the relationship between early LD as a  
19  
20 predictor of adult homelessness and associated health and service use outcomes. Unlike  
21  
22 family instability and dysfunction, which fall under the jurisdiction of child welfare  
23  
24 agencies, LD can be identified and addressed within the school system and may serve as  
25  
26 an early marker of social and developmental risk.  
27  
28  
29  
30

### 31 **METHODS**

32  
33 The Vancouver At Home Project is a randomized controlled trial (RCT) involving  
34  
35 homeless adults with mental illness in Vancouver, British Columbia. Study design and  
36  
37 sample size were determined by the At Home/Chez Soi National Research Team which  
38  
39 monitored activities at five different study sites.[19] Details related to the RCT protocol  
40  
41 such as CONSORT have been reported elsewhere[19]. The current study focuses on  
42  
43 baseline data from one study site (Vancouver) prior to randomization and does not  
44  
45 incorporate any findings related to RCT elements.  
46  
47  
48  
49

50 Eligibility criteria included legal adult status (19 years and older), current mental  
51  
52 disorder on the MINI Neuropsychiatric Interview (MINI),[20] and being absolutely  
53  
54 homeless or precariously housed. Absolute homelessness was defined as living on the  
55  
56  
57  
58  
59  
60



1 Learning problems and disabilities

2  
3 streets or in an emergency shelter for at least the past seven nights with little likelihood of  
4  
5 obtaining secure accommodation in the upcoming month. Precariously housed was  
6  
7 defined as living in a rooming house, hotel or other transitional housing; in addition,  
8  
9 individuals must have experienced at least two episodes of absolute homelessness in the  
10  
11 past year, or one episode lasting for at least four weeks in the past year.  
12  
13

14  
15 Participants were recruited through referral from over 40 agencies available to  
16  
17 homeless adults in Vancouver; the majority were recruited from homeless shelters, drop-  
18  
19 in centres, homeless outreach teams, hospitals, community mental health teams, and  
20  
21 criminal justice programs. We specifically targeted organizations that serve women,  
22  
23 youth, aboriginal peoples, and gay/lesbian/transgender individuals in order to obtain as  
24  
25 diverse and representative a sample as possible. Referral was initiated by service  
26  
27 providers and a preliminary screening for eligibility was conducted via telephone with the  
28  
29 referral agent. All participants met face-to-face with a trained research interviewer who  
30  
31 explained procedures, obtained informed consent, and confirmed study eligibility. A  
32  
33 cash honorarium of \$5 was provided for the screening process. Institutional ethics board  
34  
35 approval was obtained through Simon Fraser University and the University of British  
36  
37 Columbia.  
38  
39  
40  
41  
42  
43  
44

45 Approximately 85 individuals were turned away on the phone because they  
46  
47 clearly did not meet eligibility criteria. In addition, approximately 100 individuals were  
48  
49 invited to meet with an interviewer for further eligibility screening and/or to begin the  
50  
51 baseline questionnaire but did not show up for an appointment. Whenever possible,  
52  
53 appointments were rescheduled and interviewers tried to locate individuals in the  
54  
55 community. Finally, 92 recruits completed the formal eligibility screening process but  
56  
57  
58  
59  
60

1 Learning problems and disabilities

2  
3 were deemed ineligible. When these individuals were compared with participants who  
4  
5 were enrolled in the study, no significant differences were found in terms of current age  
6  
7 or gender.  
8  
9

10  
11 If the individual met all study criteria, they were enrolled as a participant and the  
12  
13 baseline interview commenced, consisting of a series of interviewer-administered  
14  
15 questionnaires including socio-demographic characteristics, psychiatric symptoms,  
16  
17 substance use, physical health, service use, and quality of life. Participants received a  
18  
19 further cash honorarium of \$30 upon completion of the baseline interview. The  
20  
21 following analyses are based upon data from the baseline questionnaires of 497  
22  
23 participants recruited from October 2009 to June 2011.  
24  
25  
26  
27

### 28 29 **Variables of interest**

30  
31  
32 LD were assessed using the following questions, focusing on childhood: (1) “Do  
33  
34 you think you had a learning problem or learning disability?” and (2) “Did anyone ever  
35  
36 tell you that you have a learning problem or learning disability?” Only participants who  
37  
38 responded positively to both questions were included in the analysis.  
39  
40  
41

42 With regard to mental disorders, Severe Cluster includes at least one of current  
43  
44 Psychosis, Mood Disorder with Psychotic Features, and Hypomanic or Manic Episode, as  
45  
46 identified through the MINI or documented physician diagnosis. Less Severe Cluster  
47  
48 includes at least one of current Major Depressive Episode, Panic Disorder, and Post-  
49  
50 traumatic Stress Disorder. Suicidality, Alcohol Dependence, and Substance Dependence  
51  
52 were also identified using the MINI. Frequency and type of substance use over the past  
53  
54 month were recorded using the Maudsley Addiction Profile (MAP).[21] Physical illness  
55  
56  
57  
58  
59  
60

1 Learning problems and disabilities

2  
3 was assessed by self-report using a checklist of 30 chronic health conditions (lasting  
4 longer than six months). Blood-borne infectious disease consisted of positive self-report  
5 diagnosis of HIV, Hepatitis B or Hepatitis C. Head injury status was based on the  
6 question “Did you ever receive a head injury that left you unconscious?” Shoplifting and  
7  
8 selling drugs were assessed during the past month using the MAP.  
9  
10  
11  
12  
13

14  
15  
16 Self-reported involvement with health services was collected for the past six  
17 months including visiting and talking to a health or service provider, Emergency Room  
18 visits, and being transported by ambulance. Criminal justice services included contact  
19 with the police that resulted in detention, arrest and court appearances. The Multnomah  
20 Community Ability Scale (MCAS)[22] quantifies community functioning based on 17  
21 items and was scored by the interviewer upon completion of the baseline interview.  
22  
23  
24  
25  
26  
27  
28  
29

### 30 **Statistical analyses**

31  
32  
33 Comparisons of categorical data between participants who did or did not report a  
34 learning problem or disability were conducted using Pearson’s chi-square or Fisher’s  
35 exact test. Comparisons of numeric variables (e.g., age at enrolment) between groups  
36 were conducted using the Student t test and Wilcoxon’s rank-sum test. Univariate and  
37 multivariable logistic regression analyses were used to model the independent  
38 associations between childhood LD and a series of a priori outcome variables. Outcomes  
39 variables that were significant at the  $p \leq 0.10$  level were considered for univariate and  
40 multivariable logistic regression analyses. Each variable was modeled in both univariate  
41 and multivariate settings using childhood LD as an independent risk factor and the same  
42 set of controlling variables (age at enrolment, age of first homelessness, gender, ethnicity,  
43 marital status, and language spoken in the childhood home). Both unadjusted and  
44  
45  
46  
47  
48  
49  
50  
51  
52  
53  
54  
55  
56  
57  
58  
59  
60

Learning problems and disabilities

adjusted odds ratios and 95% confidence intervals (CI) are reported and all p-values are two-sided. SPSS-19 was used to conduct these analyses. Missing values ranged from zero to 4% and were excluded from the analyses.

## RESULTS

In total, 497 participants completed the baseline questionnaire, and 133 (27%) responded positively to both indicators of childhood LD. The majority of the total sample was male (73%) and Caucasian (56%); the mean age at enrollment was 40.8 (SD=11.0) years; and the mean age when first homeless was 30.3 (SD=13.3) years. The median duration of lifetime homelessness was 36 months (IQR: 12-84 months). All bivariate comparisons by childhood LD are summarized in Tables 1 to 3. Tables 1 and 2 present demographic characteristics and current mental disorder status of participants by childhood LD status (yes vs. no).

[Insert Tables 1 and 2 about here]

Table 3 presents self-reported substance use (past month) and service use (past six months) characteristics by childhood LD status. Participants who reported having a childhood LD were significantly more likely to report a number of negative health outcomes related to physical health (i.e., blood-borne infectious diseases, migraine, and seizures), mental health (i.e., major depressive episode, panic disorder, high suicidality) and substance use (i.e., alcohol dependence, early initiation of drug use, daily drug use, and injection drug use).

[Insert Table 3 about here]

Unadjusted (UOR) and adjusted odds ratios (AOR) and 95% CI for variables included in the univariate and multivariable analyses are presented in Table 4. Results

1 Learning problems and disabilities

2  
3 from the multivariable logistic regression analyses indicate that reporting a childhood LD  
4 independently predicted not entering high school (AOR: 2.21), lifetime duration of  
5 homelessness greater than three years (AOR: 1.90), current major depressive episode  
6 (AOR: 1.64), panic disorder (AOR: 1.86), alcohol dependence (AOR: 1.69), high  
7 suicidality (AOR: 1.93), less severe cluster of mental disorders (AOR: 1.95), two or more  
8 mental disorders (AOR: 2.06), infectious disease (AOR: 1.75), migraine (AOR: 2.50),  
9 seizures (AOR: 2.23), head injury (AOR: 2.23), poor or fair overall health (AOR: 1.90),  
10 injection drug use (AOR: 2.01), daily drug and alcohol use (AOR: 1.70), daily drug use  
11 (not including alcohol) (AOR: 1.77), daily hard drug use (not including alcohol or  
12 marijuana) (AOR: 1.79), early initiation of drug use (<14 years) (AOR: 1.60), shoplifting  
13 in the past six months (AOR: 2.31), and talking to a health or social service provider in  
14 the past six months (AOR: 2.00).

15 [Insert Table 4 about here]

## 16 **DISCUSSION**

17 Our multivariable models identified several factors that were associated with self-  
18 reported childhood LD in a cohort of adults who are homeless and have a mental  
19 disorder: longer lifetime duration of homelessness; less severe mental disorders as well as  
20 multiple mental disorders and high suicidal ideation; early and severe substance use,  
21 including injection drug use and daily use of both drugs and alcohol; and physical health  
22 problems including infectious disease, head injury, multiple illnesses, and rating ones'  
23 overall health as fair or poor. Despite the complex health needs of this sub-group, the  
24 only service use variable that was predicted by childhood learning problems or  
25 disabilities was very generic: talking to a health or social service provider in the past six  
26  
27  
28  
29  
30  
31  
32  
33  
34  
35  
36  
37  
38  
39  
40  
41  
42  
43  
44  
45  
46  
47  
48  
49  
50  
51  
52  
53  
54  
55  
56  
57  
58  
59  
60

1 Learning problems and disabilities

2  
3 months. A range of criminal justice variables as well as emergency room, ambulance  
4  
5 utilization, and various other health services were not significant in our analyses.  
6

7  
8 Collectively, our results indicate that childhood LD are overrepresented among homeless  
9  
10 adults with complex comorbidities and predict a range of poor health outcomes in  
11  
12 adulthood.  
13

14  
15 These findings support previous research demonstrating a link between poor  
16  
17 academic achievement and the psychological adversity faced by some adults.[6, 23]  
18  
19 Studies of homeless and highly mobile children have identified that both groups show  
20  
21 slower learning and academic progress than their residentially stable peers.[23] However,  
22  
23 the risk of homelessness among people with LD has received scant attention in the  
24  
25 research literature.[24, 25] Among our sample of homeless adults, 41% did not graduate  
26  
27 from high school and 43% reported being in a special class in school, suggesting that  
28  
29 learning and academic achievement was challenging throughout their school years and  
30  
31 likely persists in adulthood.  
32  
33  
34  
35

36  
37 Our index of LD does not discriminate between focal and more general cognitive  
38  
39 difficulties. Several studies have found increased rates of general cognitive impairment  
40  
41 among homeless adults compared to housed comparison groups.[26, 27] In our sample of  
42  
43 homeless adults with current mental disorders, 66% reported experiencing a head injury  
44  
45 that left them unconscious. However, these injuries may have occurred in adulthood and  
46  
47 it is well documented that homeless adults are more likely to experience a variety of  
48  
49 accidents compared to housed counterparts.[27] It is also possible that childhood LD  
50  
51 among our sample were related to psychological distress in the home.[24] Regardless of  
52  
53  
54  
55  
56  
57  
58  
59  
60

1 Learning problems and disabilities

2  
3 the origin of learning problems among homeless adults, it appears that they persist over  
4  
5 time and are associated with significant functional impairment.  
6  
7

8 Childhood LD independently predicted a range of substance use problems in our  
9  
10 adult sample, including early initiation of drug use (before age 14). Abuse of alcohol and  
11  
12 other drugs places an individual at greater risk of homelessness, but is not a direct causal  
13  
14 factor.[28] Along with other studies, our findings suggest that daily drug use is a  
15  
16 common mediator for a range of early risk factors.[29] Previous research using our  
17  
18 sample of homeless adults with mental disorders found that daily drug use significantly  
19  
20 predicts duration of homelessness[30] as well as severity of mental health symptoms.[31]  
21  
22  
23

24 Cross-sectional, retrospective data cannot disentangle the unique predictors of  
25  
26 homelessness and mental illness, but it is likely that negative childhood experiences have  
27  
28 both direct and indirect (mediated by substance use) effects on participants' history of  
29  
30 homelessness. Documentation of these underlying common factors points to a broad  
31  
32 range of vulnerabilities for homelessness and mental illness. These common factors  
33  
34 increase the complexity of personal problems as well as the duration of  
35  
36 homelessness.[30] Therefore, substance dependence, especially when concurrent with  
37  
38 mental illness among homeless populations, is not only a clinical problem but also a  
39  
40 critical indicator for a range of other social and psychological problems that may need to  
41  
42 be addressed before homelessness can be resolved.  
43  
44  
45  
46  
47

48 Problems such as homelessness that have long developmental trajectories, are  
49  
50 perhaps best understood from models of cumulative adversity and amplification of  
51  
52 risk.[32] Based on life course development and social learning theory, the risk  
53  
54 amplification model addresses mechanisms through which experiences on the street  
55  
56  
57  
58  
59  
60

1 Learning problems and disabilities

2  
3 amplify negative developmental effects originating in the family. According to this  
4  
5 model, harmful behaviours and negative self-concept are perpetuated by the progressive  
6  
7 accumulation of their own consequences. Thus, homelessness can be understood as the  
8  
9 result of a developmental trajectory defined by successive environmental disruptions,  
10  
11 each of which places individuals at greater risk for homelessness and associated risk  
12  
13 factors.  
14

15  
16  
17 Individuals generally become homeless after experiencing a crisis due to limited  
18  
19 income, social support, and personal coping skills.[5, 28] However, it is unclear what  
20  
21 leads some people to become homeless while others do not. Problem Behaviour  
22  
23 Theory[33, 34] suggests that various risk factors may comprise a cluster of risky  
24  
25 behaviours that mediate the link from childhood adversity to illicit drug use in adulthood,  
26  
27 rather than distinct independent pathways. Another potential pathway linking childhood  
28  
29 adversity to adult homelessness is the likelihood that such adversity elevates individuals'  
30  
31 risk for psychiatric disorders such as depression and substance abuse, which are risk  
32  
33 factors for homelessness, by reducing one's ability to earn adequate income and maintain  
34  
35 stable housing.  
36  
37  
38  
39

#### 40 **Implications**

41  
42 The growing body of research that suggests a trajectory of risk preceding the first episode  
43  
44 of homelessness begs the question "Can outcomes such as homelessness be prevented?"  
45  
46  
47 Many researchers and policy makers have called for comprehensive preventive  
48  
49 interventions for high-risk children in public and community settings.[35, 36] Supporting  
50  
51 children's cognitive development and schooling is particularly important and early  
52  
53 childhood education programs should be available for children at greatest risk. High risk  
54  
55  
56  
57  
58  
59  
60



1 Learning problems and disabilities

2  
3 includes established indicators such as early learning problems, abuse and/or neglect,  
4  
5 behavioural and emotional problems, and early substance use. From a public health  
6  
7 perspective, early interventions in childhood might change or moderate the cycle of  
8  
9 homelessness across generations because early risk factors are often longstanding and  
10  
11 drive a trajectory of cumulative risk, potentially leading to severe psychopathology and  
12  
13 social exclusion.  
14

### 15 **Limitations**

16  
17 Despite the strengths of our study design (i.e., large sample size, diverse recruitment  
18  
19 strategy, structured diagnostic interviews), several limitations must be considered. First,  
20  
21 all variables were based on participant self-report. Given that participants were selected  
22  
23 based on current mental disorder, accuracy of recall may have been compromised.  
24  
25 Furthermore, participants were interviewed before being randomized to a housing  
26  
27 intervention, therefore, some may have modified their responses in an attempt to  
28  
29 influence the outcome of randomization. In addition, at baseline, we did not have access  
30  
31 to early trauma or family dysfunction variables. Given the association between early  
32  
33 trauma, foster care placements and adult homelessness,[2] it will be important to further  
34  
35 examine the impact of these variables on later health and social outcomes. Similarly, we  
36  
37 did not have access to measures of general cognitive impairment at baseline.  
38  
39 Examination of current cognitive impairment, particularly as it relates to early learning  
40  
41 problems, may shed light on current health and social functioning.  
42  
43  
44  
45  
46  
47  
48  
49

### 50 **Future directions**

51  
52 Early indicators of risk clearly cannot explain all cases of homelessness. Many people  
53  
54 without early risk factors become homeless and many who experience risk do not become  
55  
56  
57  
58  
59  
60

1 Learning problems and disabilities

2  
3 homeless. Further research is needed to examine what differentially places people at risk  
4  
5 for risk.[37] We need better theory and better data to understand how social factors  
6  
7 regulate behaviours or distribute individuals into risk groups and how those social factors  
8  
9  
10 'push' individual trajectories toward or away from adverse outcomes. However, our  
11  
12 results linking early learning problems to homelessness, mental illness and substance use  
13  
14 are consistent with a growing body of research indicating that adverse childhood events  
15  
16 are potent risk factors for a number of psychiatric and substance use disorders.[6]  
17  
18

19  
20 Real prevention with regard to homelessness and other social problems will  
21  
22 require systemic social and policy changes that address the environments within which  
23  
24 children adapt so that they can mature into well-functioning adults. Nonetheless, our  
25  
26 findings, along with others', outline a risk profile that can guide future research into  
27  
28 mechanisms and pathways through which childhood risks are translated into adult  
29  
30 sequelae. Interventions that can effectively address childhood risk factors such as  
31  
32 learning problems and disabilities may ultimately prevent critical social problems  
33  
34 including homelessness and the enormous social and individual costs related to these  
35  
36 problems.  
37  
38  
39

#### 40 **ACKNOWLEDGEMENTS**

41  
42  
43 The authors thank the At Home/Chez Soi Project collaborative at both national and local  
44  
45 levels; National project team: J. Barker, PhD (2008–2011) and C. Keller, National Project  
46  
47 Leads; P. Goering, RN, PhD, Research Lead; approximately 40 investigators from across  
48  
49 Canada and the US; 5 site coordinators; numerous service and housing providers; and  
50  
51 persons with lived experience.  
52  
53  
54

#### 55 **DECLARATION OF INTERESTS**

1 Learning problems and disabilities  
2

3 This research was funded by Health Canada and the Mental Health Commission of  
4 Canada. The views expressed herein solely represent the authors.  
5  
6  
7

## 8 REFERENCES 9

- 10 1 Shinn M. International homelessness: Policy, socio-cultural, and individual  
11 perspectives. *J Soc Issues* 2007;**63**(3):657-677.  
12  
13 2 Sullivan G, Burnam A, Koegel P. Pathways to homelessness among the mentall ill. *Soc*  
14 *Psychiatry Epidemiol* 2000;**35**:444-450.  
15  
16 3 Herman D, Susser ES, Struening EL, Link BL. Adverse childhood experiences: are  
17 they risk factors for adult homelessness? *Am J Public Health* 1997;**87**(2):249-255.  
18  
19 4 Koegel P, Malamid E, Burnam MA. Childhood risk factors for homelessness among  
20 homeless adults. *Am J Public Health* 1995;**85**(12):1642-1649.  
21  
22 5 Lehmann ER, Kass PH, Drake CM, Nichols SB. Risk factors for first-time  
23 homelessness in low-income women. *Am J Orthopsychiatry* 2007;**77**(1):20-28.  
24  
25 6 Masten A, Long JD, Roisman G, Burt K, Obradovic J, Roberts M, et al. Developmental  
26 cascades: linking academic achievement, externalizing and internalizing symptoms over  
27 20 years. *Dev Psychol* 2005;**41**:733-746.  
28  
29 7 Wiener J, Siegel L. A Canadian perspective on learning disabilities. *J Learn Disabil*  
30 1992;**25**(6):340-350.  
31  
32 8 Ferrari M. A comparative assessment of the cognitive functioning of adults with  
33 childhood histories of learning disability and adults with neurocognitive disorders. *J Dev*  
34 *Phys Disabil* 2009;**21**:355-368.  
35  
36 9 Statistics Canada. The daily release 2007. Available at  
37 <http://www.statcan.ca/Daily/English/071203/d071203a.htm>. Retrieved on April 25, 2012.  
38  
39  
40  
41  
42  
43  
44  
45  
46  
47  
48  
49  
50  
51  
52  
53  
54  
55  
56  
57  
58  
59  
60

Learning problems and disabilities

1  
2  
3  
4 10 Blackorby J, Wagner M. Longitudinal postschool outcomes of youth with disabilities:  
5 findings from the National Longitudinal Transition Study. *Except Child* 1996;**62**(5):399-  
6  
7 413.

8  
9  
10  
11 11 Beitchman JH, Wilson B, Douglas L, Young A, Adlaf E. Substance abuse disorders in  
12 young adults with and without LD: predictive and concurrent relationships. *J Learn*  
13  
14  
15  
16  
17  
18  
19  
20  
21  
22  
23  
24  
25  
26  
27  
28  
29  
30  
31  
32  
33  
34  
35  
36  
37  
38  
39  
40  
41  
42  
43  
44  
45  
46  
47  
48  
49  
50  
51  
52  
53  
54  
55  
56  
57  
58  
59  
60  
*Disabil* 2001;**34**(4):317-332.

12 Gerber PJ. The impact of learning disabilities on adulthood: a review of the  
evidenced-based literature for research and practice in adult education. *J Learn Disabil*  
2012;**45**(1):31-46.

13 Janusis GM, Weyandt LL. An exploratory study of substance use and misuse among  
college students with and without ADHD and other disabilities. *J Atten Disord* 2010;  
**14**(3):205-215.

14 Weinberg NZ. Risk factors for adolescent substance abuse. *J Learn Disabil* 2001;  
**34**(4):343-351.

15 Buysse V, Goldman B, Skinner ML. Seeing effects on friendship formation among  
young children with and without learning disabilities. *Except Child* 2003;**68**(4):503-517.

16 Svetaz M, Ireland M, Blum R. Adolescents with learning disabilities: risk and  
protective factors associated with emotional well-being. *J Adol Health* 2000;**27**:340-348.

17 McNamara JK, Willoughby T. A longitudinal study of risk-taking behavior in  
adolescents with learning disabilities. *Learn Disabil Res Prac* 2010;**25**(1):11-24.

18 Ben-Shlomo Y, Kuh D. A life course approach to chronic disease epidemiology:  
conceptual models, empirical challenges and interdisciplinary perspectives. *Int J*  
*Epidemiol* 2002;**34**(2):285-293.

1 Learning problems and disabilities

2  
3 19 Goering PN, Streiner DL, Adair C, Aubry T, Barker J, Distasio J,  
4  
5 et al. The At Home/Chez Soi trial protocol: a pragmatic, multi-site, randomised  
6  
7 controlled trial of a Housing First intervention for homeless individuals with mental  
8  
9 illness in five Canadian cities. *BMJ Open* 2011;**1**(2):e000323.

10  
11 20 Sheehan DV, Lecrubier Y, Sheehan KH, Amorim P, Janavs J, Weiller E. et al. The  
12  
13 Mini-International Neuropsychiatric Interview (M.I.N.I.): The development and  
14  
15 validation of a structured diagnostic psychiatric interview for DSM-IV and ICD-10. *J*  
16  
17 *Clin Psychiatry* 1998;**59**(Suppl 20):22-33.

18  
19 21 Marsden J, Gossop M, Stewart D, Best D, Farrell M, Strang, J. *The Maudsley*  
20  
21 *Addiction Profile (MAP): A brief instrument for treatment outcome research.*  
22  
23 *Development and User Manual.* London UK: National Addiction Centre/Institute of  
24  
25 Psychiatry 1998. Available at:

26  
27 [http://www.iop.kcl.ac.uk/iopweb/blob/downloads/locator/l\\_346\\_MAP.pdf](http://www.iop.kcl.ac.uk/iopweb/blob/downloads/locator/l_346_MAP.pdf). Accessed  
28  
29 April 25, 2012.

30  
31 22 Barker S., Barron N., McFarland B.H., et al. A community ability scale for chronically  
32  
33 mentally ill consumer. *Community Ment Health J* 1994;**30**:459-472.

34  
35 23 Obradovic J, Long JD, Cutuli JJ, Chan C, Hinz E, Heistad D, Masten A. Academic  
36  
37 achievement of homeless and highly mobile children in an urban school district:  
38  
39 longitudinal evidence on risk, growth, and resilience. *Dev Psychopathol* 2009;**21**:493-  
40  
41 518.

42  
43 24 Trueland J. People with learning disabilities hidden among the homeless. *Learn Dis*  
44  
45 *Prac* 2009;**12**(2):18-20

Learning problems and disabilities

1  
2  
3 25 Spence S, Stevens R, Parks R. Cognitive dysfunction in homeless adults: a systematic  
4 review. *J R Soc Med* 2004;**97**:375-379.  
5  
6

7  
8 26 Bousman C, Twamley E, Vella L, Gale M, Norman S, Judd P, et al. Homelessness and  
9 neuropsychological impairment: preliminary analysis of adults entering outpatient  
10 psychiatric treatment. *J Nerv Ment Dis* 2010;**198**(11):790-794.  
11  
12

13  
14 27 Hwang SW, Colantonio A, Chiu S, Tolomiczenko G, Kiss A, Cowan L, et al. The  
15 effect of traumatic head injury on the health of homeless people. *Can Med Assoc J*  
16  
17 2008;**179**(8):779-784.  
18  
19

20  
21 28 Sosin MR, Bruni M. Homelessness and vulnerability among adults with and without  
22 alcohol problems. *Subst Use Misuse* 1997;**32**(7-8):939-968.  
23  
24

25  
26 29 Brook DW, Brook JS, Zhang C, Cohen P, Whiteman M. Drug use and the risk of  
27 major depressive disorder, alcohol dependence, and substance use disorder. *Arch Gen*  
28  
29 2002;**59**(11):1039-1044.  
30  
31

32  
33 30 Patterson M, Somers JM, Moniruzzaman A. Prolonged and persistent homelessness:  
34 Multivariable analyses in a cohort experiencing current homelessness and mental illness  
35  
36 in Vancouver, British Columbia. *Ment Health Subst Use* 2012;**5**(2):85-101.  
37  
38

39  
40 31 Palepu A, Patterson M, Strehlau V, Moniruzzaman A, tan de Bibiana J, et al. Daily  
41 Substance Use and Mental Health Symptoms among a cohort of Homeless Adults in  
42  
43 Vancouver, British Columbia. *J Urban Health*, under review.  
44  
45

46  
47 32 Paradise M, Cause AM, Ginzler J, Wert S, Wruck K, Brooker M. The role of  
48 relationships in developmental trajectories of homeless and runaway youth. In: Sarason,  
49  
50 BR, Duck S, eds. *Personal relationships: Implications for clinical and community*  
51  
52 *psychology*. NY: John Wiley & Sons Ltd 2001:159-179.  
53  
54  
55  
56  
57  
58  
59  
60

1 Learning problems and disabilities

2  
3 33 Jessor R. Risk behavior in adolescence: a psychosocial framework for understanding  
4 and action. *J Adol Health* 1991;**12**:597-605.  
5  
6

7  
8 34 Jessor R, Jessor SL. *Problem Behavior and Psychosocial Development: A*  
9  
10 *Longitudinal Study of Youth*. NY: Academic Press 1977.  
11

12 35 Lee SS, August GJ, Gewirtz A, Klimes-Dougan B, Bloomquist M, Realmuto G.  
13 Identifying unmet mental health needs in children of formerly homeless mothers living in  
14 a supportive housing community sector of care. *J Abnorm Child Psychol* 2010;**38**:421-  
15  
16 432.  
17  
18  
19

20  
21 36 Shinn M, Schteingart JS, Williams NC, Carlin-Mathis J, Bialo-Karagis N, Becker-  
22  
23 Klein R, et al. Long-term associations of homelessness with children's well-being. *Am*  
24  
25 *Behav Sci* 2008;**51**(6):798-809.  
26  
27  
28

29 37 Link B, Phelan J. Social conditions as fundamental causes of disease. *J Health Soc*  
30  
31 *Beh* 1995;**35**:80-94.  
32  
33  
34  
35  
36  
37  
38  
39  
40  
41  
42  
43  
44  
45  
46  
47  
48  
49  
50  
51  
52  
53  
54  
55  
56  
57  
58  
59  
60

## Learning problems and disabilities

Table 1: Comparisons of socio-demographic characteristics between participants who reported childhood learning problems or disabilities (LD-Yes; n=133) and those who did not (LD-No; n=364).<sup>1</sup>

| Variable                                                        | Total Sample<br>N (%) | LD-No<br>N (%) | LD-Yes<br>N (%) | p value  |
|-----------------------------------------------------------------|-----------------------|----------------|-----------------|----------|
| Male gender                                                     | 359 (73)              | 259 (72)       | 100 (76)        | 0.375    |
| Age at enrolment                                                |                       |                |                 | 0.001**  |
| 19-25 years                                                     | 36 (7)                | 25 (7)         | 11 (8)          |          |
| 25-44 years                                                     | 281 (57)              | 190 (52)       | 91 (68)         |          |
| Over 44 years                                                   | 180 (36)              | 149 (41)       | 31 (23)         |          |
| Ethnicity                                                       |                       |                |                 | 0.469    |
| Aboriginal                                                      | 77 (15)               | 52 (14)        | 25 (19)         |          |
| Caucasian                                                       | 280 (56)              | 208 (57)       | 72 (54)         |          |
| Other                                                           | 140 (28)              | 104 (29)       | 36 (27)         |          |
| Educational attainment ( $\leq$ Grade 8)                        | 76 (15)               | 44 (12)        | 32 (25)         | <0.001** |
| Single marital status                                           | 343 (70)              | 250 (69)       | 93 (70)         | 0.797    |
| Language spoken at home during childhood (English)              | 392 (79)              | 282 (77)       | 110 (83)        | 0.206    |
| Psychiatric hospitalization (past 5 years) longer than 6 months | 57 (12)               | 43 (12)        | 14 (11)         | 0.686    |
| Psychiatric hospitalization (past 5 years) 2 or more times      | 253 (53)              | 189 (54)       | 64 (50)         | 0.542    |
| Employment history (at least 1 year of continuous work)         | 323 (65)              | 243 (67)       | 80 (60)         | 0.138    |
| Jail (past 6 months)                                            | 68 (14)               | 46 (13)        | 22 (17)         | 0.262    |
| Duration of homelessness                                        |                       |                |                 |          |
| Total lifetime (>3 years)                                       | 234 (48)              | 155 (43)       | 79 (61)         | <0.001** |
| Longest single period (>1 year)                                 | 245 (50)              | 174 (48)       | 71 (55)         | 0.143    |
| Age of first homelessness (<25 years)                           | 214 (44)              | 143 (39)       | 71 (56)         | 0.001**  |
| Overall health (poor or fair)                                   | 235 (47)              | 161 (44)       | 74 (56)         | 0.026*   |
| MCAS total score (<56) #                                        | 244 (49)              | 177 (49)       | 67 (50)         | 0.730    |

<sup>1</sup> Each multivariable model was controlled for age (continuous measure), age of first homelessness age (continuous measure), gender, ethnicity (Aboriginals, Caucasian, Other), marital status (Single vs. Other) and language spoken in childhood home (English vs. Other).

# Dichotomized based on median value.

\*\*p $\leq$ 0.001

\*p $\leq$ 0.05



## Learning problems and disabilities

Table 2: Comparisons of mental disorders and physical illness between participants who reported childhood learning problems or disability (LD-Yes; n=133) and those who did not (LD-No; n=364).<sup>1</sup>

| Variable                              | Total sample<br>N (%) | LD-No<br>N (%) | LD-Yes<br>N (%) | p value  |
|---------------------------------------|-----------------------|----------------|-----------------|----------|
| <i>Mental Disorders (past month)</i>  |                       |                |                 |          |
| Major Depressive Episode              | 199 (40)              | 134 (37)       | 65 (49)         | 0.015*   |
| Manic or Hypomanic Episode            | 97 (20)               | 64 (18)        | 33 (25)         | 0.072+   |
| Post-traumatic Stress Disorder        | 129 (26)              | 88 (24)        | 41 (31)         | 0.122    |
| Panic Disorder                        | 104 (21)              | 64 (18)        | 40 (30)         | 0.002*   |
| Mood Disorder with Psychotic Features | 84 (17)               | 57 (16)        | 27 (20)         | 0.208    |
| Psychotic Disorder                    | 263 (53)              | 200 (55)       | 63 (47)         | 0.134    |
| Alcohol dependence                    | 121 (24)              | 79 (22)        | 42 (32)         | 0.023*   |
| Substance dependence                  | 288 (58)              | 205 (56)       | 83 (62)         | 0.224    |
| Two or more mental disorders          | 240 (48)              | 158 (43)       | 82 (62)         | <0.001** |
| High suicidality                      | 87 (18)               | 54 (15)        | 33 (25)         | 0.010+   |
| Less severe cluster                   | 264 (53)              | 176 (48)       | 88 (66)         | <0.001** |
| Severe cluster                        | 363 (73)              | 267 (73)       | 96 (72)         | 0.794    |
| <i>Physical Health</i>                |                       |                |                 |          |
| Migraine                              | 157 (32)              | 94 (26)        | 63 (48)         | <0.001** |
| Epilepsy or seizures                  | 67 (14)               | 40 (11)        | 27 (21)         | 0.006*   |
| Blood-borne infectious diseases       | 157 (32)              | 103 (29)       | 54 (41)         | 0.008*   |
| Head injury                           | 270 (56)              | 179 (51)       | 91 (71)         | <0.001** |
| Two or more physical conditions       | 402 (81)              | 287 (78.8)     | 115 (86)        | 0.056+   |

<sup>1</sup> Each multivariable model was controlled for age (continuous), age of first homelessness age (continuous), gender, ethnicity (Aboriginals, Caucasian, Other), marital status (Single vs. Other) and language spoken in childhood home (English vs. Other).

\*\*p≤0.001

\*p≤0.05

+ p≤0.10

## Learning problems and disabilities

Table 3: Comparisons of substance use and service utilization between participants who reported childhood learning problems or disability (LD-Yes; n=133) and those who did not (LD-No; n=364).<sup>1</sup>

| Variable                                       | Total sample<br>N (%) | LD-No<br>N (%) | LD-Yes<br>N (%) | p value |
|------------------------------------------------|-----------------------|----------------|-----------------|---------|
| <i>Substance Use (past month)</i>              |                       |                |                 |         |
| IV drug use                                    | 88 (18)               | 53 (15)        | 35 (27)         | 0.003*  |
| Daily substance use (including alcohol)        | 143 (29)              | 91 (25)        | 52 (39)         | 0.002*  |
| Daily drug use (no alcohol)                    | 126 (25)              | 78 (21)        | 48 (36)         | 0.001*  |
| Daily hard drug use (no alcohol, no marijuana) | 74 (15)               | 45 (12)        | 29 (22)         | 0.009*  |
| Daily alcohol use                              | 26 (5)                | 17 (5)         | 9 (7)           | 0.367   |
| Polysubstance use (no alcohol)                 | 188 (38)              | 128 (35)       | 60 (45)         | 0.050+  |
| Age first drunk (<14 years)                    | 212 (45)              | 142 (42)       | 70 (56)         | 0.007*  |
| Age of first drug use (<14 years)              | 178 (40)              | 114 (35)       | 64 (52)         | 0.001*  |
| Sold drugs                                     | 50 (10)               | 32 (9)         | 18 (14)         | 0.140   |
| Shop-lifting                                   | 62 (13)               | 34 (10)        | 28 (21)         | 0.001*  |
| <i>Service Use (past 6 months)</i>             |                       |                |                 |         |
| Psychiatrist                                   | 134 (27)              | 109 (30)       | 25 (19)         | 0.013*  |
| Addiction counselor                            | 18 (4)                | 10 (3)         | 8 (6)           | 0.084+  |
| Seen by a health/social service provider       | 384 (78)              | 276 (76)       | 108 (82)        | 0.204   |
| Talked with a health/social service provider   | 112 (23)              | 69 (19)        | 43 (32)         | 0.002*  |
| ER visit (yes/no)                              | 281 (58)              | 204 (57)       | 77 (60)         | 0.594   |
| Multiple ER visits (three or more)             | 107 (22)              | 71 (20)        | 36 (28)         | 0.058+  |
| Ambulance (yes/no)                             | 195 (40)              | 147 (41)       | 48 (36)         | 0.381   |
| Police detention (yes/no)                      | 80 (19)               | 61 (19)        | 19 (17)         | 0.610   |
| Arrested (yes/no)                              | 172 (36)              | 124 (35)       | 48 (38)         | 0.603   |
| Multiple arrests (two or more)                 | 75 (16)               | 48 (14)        | 27 (21)         | 0.044+  |
| Court appearance                               | 172 (35)              | 127 (36)       | 45 (35)         | 0.932   |
| Justice program                                | 48 (11)               | 30 (9)         | 18 (16)         | 0.076+  |

<sup>1</sup> Each multivariable model was controlled for age (continuous), age of first homelessness (continuous), gender, ethnicity (Aboriginals, Caucasian, Other), marital status (Single vs. Other) and language spoken in childhood home (English vs. Other).

\*\*p<0.001

\*p<0.05

+ p<0.10

## Learning problems and disabilities

Table 4: Logistic regression analyses for socio-demographics, mental disorders, substance use and service utilization related outcomes based on early learning problems or disability (n=497).

| Outcome Variable                                          | Unadjusted OR<br>(95% CI) | Adjusted OR<br>(95% CI) <sup>1</sup> |
|-----------------------------------------------------------|---------------------------|--------------------------------------|
| Age of first homelessness (<25 years) <sup>2</sup>        | 1.96 (1.30, 2.95)**       | 1.52 (0.95, 2.44)                    |
| Lifetime duration of homelessness (>3 years) <sup>#</sup> | 2.11 (1.40, 3.18)**       | 1.90 (1.19, 3.06)*                   |
| Education level (Grade 8 or less)                         | 2.38 (1.43, 3.95)         | 2.20 (1.28, 3.81)                    |
| <i>Type of Mental Disorder</i>                            |                           |                                      |
| Major Depressive Episode                                  | 1.64 (1.10, 2.45)*        | 1.64 (1.07, 2.52)*                   |
| Manic or Hypomanic Episode                                | 1.55 (0.96, 2.49)         | 1.51 (0.91, 2.51)                    |
| Panic Disorder                                            | 2.02 (1.28, 3.19)*        | 1.86 (1.15, 3.02)*                   |
| Alcohol dependence                                        | 1.67 (1.07, 2.59)*        | 1.69 (1.06, 2.69)*                   |
| Two or more mental disorders                              | 2.10 (1.40, 3.15)**       | 2.06 (1.33, 3.19)**                  |
| High suicidality                                          | 1.89 (1.16, 3.09)*        | 1.93 (1.15, 3.24)*                   |
| Less severe cluster of mental disorders                   | 2.10 (1.38, 3.16)**       | 1.95 (1.25, 3.04)*                   |
| <i>Physical Health</i>                                    |                           |                                      |
| Blood-borne infectious diseases                           | 1.76 (1.16, 2.66)*        | 1.75 (1.11, 2.74)*                   |
| Migraine                                                  | 2.57 (1.70, 3.90)**       | 2.50 (1.62, 3.88)**                  |
| Seizures                                                  | 2.11 (1.23, 3.61)*        | 2.23 (1.25, 4.00)*                   |
| Multiple physical illness                                 | 1.71 (0.98, 2.99)         | 2.16 (1.16, 4.02)*                   |
| Overall health (fair/poor)                                | 1.57 (1.06, 2.35)*        | 1.90 (1.24, 2.92)*                   |
| History of head injury                                    | 2.33 (1.51, 3.59)*        | 2.23 (1.42, 3.50)*                   |
| <i>Substance Use</i>                                      |                           |                                      |
| IV drug use                                               | 2.07 (1.28, 3.36)*        | 2.01 (1.19, 3.39)*                   |
| Daily drug use (no alcohol)                               | 2.07 (1.34, 3.19)**       | 1.77 (1.12, 2.80)*                   |
| Daily drug use (no alcohol, no marijuana)                 | 1.98 (1.18, 3.31)*        | 1.79 (1.03, 3.11)*                   |
| Daily substance use (including alcohol)                   | 1.93 (1.26, 2.94)*        | 1.70 (1.09, 2.65)*                   |
| Poly-substance use (no alcohol)                           | 1.50 (1.00, 2.24)         | 1.27 (0.82, 1.97)                    |
| Age first drunk (<14 years)                               | 1.75 (1.16, 2.65)*        | 1.37 (0.88, 2.14)                    |
| Age of first drug use (<14 years)                         | 1.98 (1.30, 3.02)**       | 1.60 (1.02, 2.50)*                   |
|                                                           | 2.53 (1.46, 4.36)**       | 2.31 (1.30, 4.11)*                   |
| <i>Service Use</i>                                        |                           |                                      |
| Talked with a health/social service provider              | 1.99 (1.30, 3.11)*        | 2.00 (1.25, 3.21)*                   |
| Multiple ER visits (three or more) <sup>#</sup>           | 1.12 (0.74, 1.68)         | 1.04 (0.67, 1.60)                    |
| Multiple arrests (two or more) <sup>#</sup>               | 1.70 (1.01, 2.87)*        | 1.65 (0.95, 2.86)                    |
| Justice program                                           | 1.76 (0.94, 3.92)         | 1.34 (0.59, 3.08)                    |

<sup>1</sup> Each multivariable model was controlled for age (continuous), age of first homelessness (continuous), gender, ethnicity (Aboriginal, Caucasian, Other), marital status (Single, Other) and language spoken in the childhood home (English, Other).

Learning problems and disabilities

<sup>2</sup> This multivariable model was controlled for age (continuous), gender, ethnicity (Aboriginal, Caucasian, Other), marital status (Single, Other), and language spoken in the childhood home (English, Other).

# Dichotomized based on median value.

\*\*p≤0.001

\*p≤0.05

For peer review only

1  
2  
3  
4  
5  
6  
7  
8  
9  
10  
11  
12  
13  
14  
15  
16  
17  
18  
19  
20  
21  
22  
23  
24  
25  
26  
27  
28  
29  
30  
31  
32  
33  
34  
35  
36  
37  
38  
39  
40  
41  
42  
43  
44  
45  
46  
47  
48  
49  
50  
51  
52  
53  
54  
55  
56  
57  
58  
59  
60

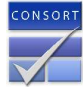

## CONSORT 2010 checklist of information to include when reporting a randomised trial\*

| Section/Topic                    | Item No | Checklist item                                                                                                                                                                                                    | Reported on page No |
|----------------------------------|---------|-------------------------------------------------------------------------------------------------------------------------------------------------------------------------------------------------------------------|---------------------|
| <b>Title and abstract</b>        |         |                                                                                                                                                                                                                   |                     |
|                                  | 1a      | Identification as a randomised trial in the title ( <b>our findings focus on baseline data prior to the RCT elements. The RCT protocol and CONSORT details have been reported in a previous BMJ publication</b> ) | N/A                 |
|                                  | 1b      | Structured summary of trial design, methods, results, and conclusions (for specific guidance see CONSORT for abstracts)                                                                                           | 2-3                 |
| <b>Introduction</b>              |         |                                                                                                                                                                                                                   |                     |
| Background and objectives        | 2a      | Scientific background and explanation of rationale                                                                                                                                                                | 5-6                 |
|                                  | 2b      | Specific objectives or hypotheses                                                                                                                                                                                 | 7                   |
| <b>Methods</b>                   |         |                                                                                                                                                                                                                   |                     |
| Trial design                     | 3a      | Description of trial design (such as parallel, factorial) including allocation ratio                                                                                                                              | NA (see 1a)         |
|                                  | 3b      | Important changes to methods after trial commencement (such as eligibility criteria), with reasons                                                                                                                | NA (see 1a)         |
| Participants                     | 4a      | Eligibility criteria for participants                                                                                                                                                                             | 7-8                 |
|                                  | 4b      | Settings and locations where the data were collected                                                                                                                                                              | 7-8                 |
| Interventions                    | 5       | The interventions for each group with sufficient details to allow replication, including how and when they were actually administered                                                                             | NA (see 1a)         |
| Outcomes                         | 6a      | Completely defined pre-specified primary and secondary outcome measures, including how and when they were assessed                                                                                                | 9-10                |
|                                  | 6b      | Any changes to trial outcomes after the trial commenced, with reasons                                                                                                                                             | NA                  |
| Sample size                      | 7a      | How sample size was determined                                                                                                                                                                                    | 7                   |
|                                  | 7b      | When applicable, explanation of any interim analyses and stopping guidelines                                                                                                                                      | NA                  |
| <b>Randomisation:</b>            |         |                                                                                                                                                                                                                   |                     |
| Sequence generation              | 8a      | Method used to generate the random allocation sequence                                                                                                                                                            | NA (see 1a)         |
|                                  | 8b      | Type of randomisation; details of any restriction (such as blocking and block size)                                                                                                                               | NA (see 1a)         |
| Allocation concealment mechanism | 9       | Mechanism used to implement the random allocation sequence (such as sequentially numbered containers), describing any steps taken to conceal the sequence until interventions were assigned                       | NA (see 1a)         |
| Implementation                   | 10      | Who generated the random allocation sequence, who enrolled participants, and who assigned participants to interventions                                                                                           | NA (see 1a)         |

|    |                                                                                                                                                                                           |     |                                                                                                                                                   |                |
|----|-------------------------------------------------------------------------------------------------------------------------------------------------------------------------------------------|-----|---------------------------------------------------------------------------------------------------------------------------------------------------|----------------|
| 1  |                                                                                                                                                                                           |     |                                                                                                                                                   |                |
| 2  | Blinding                                                                                                                                                                                  | 11a | If done, who was blinded after assignment to interventions (for example, participants, care providers, those assessing outcomes) and how          | NA             |
| 3  |                                                                                                                                                                                           |     |                                                                                                                                                   |                |
| 4  |                                                                                                                                                                                           | 11b | If relevant, description of the similarity of interventions                                                                                       | NA             |
| 5  | Statistical methods                                                                                                                                                                       | 12a | Statistical methods used to compare groups for primary and secondary outcomes                                                                     | 10-11          |
| 6  |                                                                                                                                                                                           | 12b | Methods for additional analyses, such as subgroup analyses and adjusted analyses                                                                  | NA             |
| 7  |                                                                                                                                                                                           |     |                                                                                                                                                   |                |
| 8  |                                                                                                                                                                                           |     |                                                                                                                                                   |                |
| 9  | <b>Results</b>                                                                                                                                                                            |     |                                                                                                                                                   |                |
| 10 | Participant flow (a                                                                                                                                                                       | 13a | For each group, the numbers of participants who were randomly assigned, received intended treatment, and                                          | NA (see 1a)    |
| 11 | diagram is strongly                                                                                                                                                                       |     | were analysed for the primary outcome                                                                                                             |                |
| 12 | recommended)                                                                                                                                                                              | 13b | For each group, losses and exclusions after randomisation, together with reasons                                                                  | NA (see 1a)    |
| 13 | Recruitment                                                                                                                                                                               | 14a | Dates defining the periods of recruitment (and follow-up)                                                                                         | 9              |
| 14 |                                                                                                                                                                                           | 14b | Why the trial ended or was stopped                                                                                                                | NA             |
| 15 | Baseline data                                                                                                                                                                             | 15  | A table showing baseline demographic and clinical characteristics for each group                                                                  | Table 1 (p.23) |
| 16 | Numbers analysed                                                                                                                                                                          | 16  | For each group, number of participants (denominator) included in each analysis and whether the analysis was by original assigned groups           | NA             |
| 17 |                                                                                                                                                                                           |     |                                                                                                                                                   |                |
| 18 | Outcomes and                                                                                                                                                                              | 17a | For each primary and secondary outcome, results for each group, and the estimated effect size and its precision (such as 95% confidence interval) | Tables 2-4     |
| 19 | estimation                                                                                                                                                                                |     |                                                                                                                                                   | (pp.24-26)     |
| 20 |                                                                                                                                                                                           | 17b | For binary outcomes, presentation of both absolute and relative effect sizes is recommended                                                       |                |
| 21 | Ancillary analyses                                                                                                                                                                        | 18  | Results of any other analyses performed, including subgroup analyses and adjusted analyses, distinguishing pre-specified from exploratory         |                |
| 22 |                                                                                                                                                                                           |     |                                                                                                                                                   |                |
| 23 | Harms                                                                                                                                                                                     | 19  | All important harms or unintended effects in each group (for specific guidance see CONSORT for harms)                                             | NA             |
| 24 |                                                                                                                                                                                           |     |                                                                                                                                                   |                |
| 25 | <b>Discussion</b>                                                                                                                                                                         |     |                                                                                                                                                   |                |
| 26 | Limitations                                                                                                                                                                               | 20  | Trial limitations, addressing sources of potential bias, imprecision, and, if relevant, multiplicity of analyses                                  | 16             |
| 27 | Generalisability                                                                                                                                                                          | 21  | Generalisability (external validity, applicability) of the trial findings                                                                         | NA             |
| 28 | Interpretation                                                                                                                                                                            | 22  | Interpretation consistent with results, balancing benefits and harms, and considering other relevant evidence                                     | 12-15          |
| 29 |                                                                                                                                                                                           |     |                                                                                                                                                   |                |
| 30 | <b>Other information</b>                                                                                                                                                                  |     |                                                                                                                                                   |                |
| 31 | Registration                                                                                                                                                                              | 23  | Registration number and name of trial registry                                                                                                    | 3              |
| 32 | Protocol                                                                                                                                                                                  | 24  | Where the full trial protocol can be accessed, if available                                                                                       | 7              |
| 33 | Funding                                                                                                                                                                                   | 25  | Sources of funding and other support (such as supply of drugs), role of funders                                                                   | 18             |
| 34 |                                                                                                                                                                                           |     |                                                                                                                                                   |                |
| 35 |                                                                                                                                                                                           |     |                                                                                                                                                   |                |
| 36 |                                                                                                                                                                                           |     |                                                                                                                                                   |                |
| 37 |                                                                                                                                                                                           |     |                                                                                                                                                   |                |
| 38 |                                                                                                                                                                                           |     |                                                                                                                                                   |                |
| 39 | *We strongly recommend reading this statement in conjunction with the CONSORT 2010 Explanation and Elaboration for important clarifications on all the items. If relevant, we also        |     |                                                                                                                                                   |                |
| 40 | recommend reading CONSORT extensions for cluster randomised trials, non-inferiority and equivalence trials, non-pharmacological treatments, herbal interventions, and pragmatic trials.   |     |                                                                                                                                                   |                |
| 41 | Additional extensions are forthcoming: for those and for up to date references relevant to this checklist, see <a href="http://www.consort-statement.org">www.consort-statement.org</a> . |     |                                                                                                                                                   |                |
| 42 |                                                                                                                                                                                           |     |                                                                                                                                                   |                |
| 43 |                                                                                                                                                                                           |     |                                                                                                                                                   |                |
| 44 | CONSORT 2010 checklist                                                                                                                                                                    |     |                                                                                                                                                   |                |
| 45 |                                                                                                                                                                                           |     |                                                                                                                                                   |                |
| 46 |                                                                                                                                                                                           |     |                                                                                                                                                   |                |
| 47 |                                                                                                                                                                                           |     |                                                                                                                                                   |                |
| 48 |                                                                                                                                                                                           |     |                                                                                                                                                   |                |
| 49 |                                                                                                                                                                                           |     |                                                                                                                                                   |                |

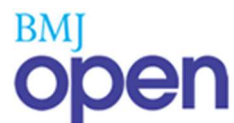

**Missed Opportunities: Childhood Learning Disabilities as Early Indicators of Risk among Homeless Adults with Mental Illness in Vancouver, British Columbia**

|                                 |                                                                                                                                                                                                                |
|---------------------------------|----------------------------------------------------------------------------------------------------------------------------------------------------------------------------------------------------------------|
| Journal:                        | <i>BMJ Open</i>                                                                                                                                                                                                |
| Manuscript ID:                  | bmjopen-2012-001586.R1                                                                                                                                                                                         |
| Article Type:                   | Research                                                                                                                                                                                                       |
| Date Submitted by the Author:   | 18-Oct-2012                                                                                                                                                                                                    |
| Complete List of Authors:       | Patterson, Michelle; Simon Fraser University, Health Sciences<br>Moniruzzaman, Akm; Simon Fraser University,<br>Frankish, Charles; University of British Columbia,<br>Somers, Julian; Simon Fraser University, |
| <b>Primary Subject Heading</b>: | Mental health                                                                                                                                                                                                  |
| Secondary Subject Heading:      | Public health                                                                                                                                                                                                  |
| Keywords:                       | MENTAL HEALTH, Substance misuse < PSYCHIATRY, PSYCHIATRY, PUBLIC HEALTH                                                                                                                                        |
|                                 |                                                                                                                                                                                                                |

SCHOLARONE™  
Manuscripts

Learning problems and disabilities

## MANUSCRIPT COVER PAGE

**TITLE. Missed Opportunities: Childhood Learning Disabilities as Early Indicators  
of Risk among Homeless Adults with Mental Illness in Vancouver, British Columbia.**

### **AUTHORS:**

Michelle L. Patterson, PhD (corresponding author)  
Adjunct Professor  
Simon Fraser University  
Faculty of Health Sciences  
8888 University Drive, Blusson Hall Rm. 11010  
Burnaby, British Columbia  
V5A 1S6 Canada  
[michelle\\_patterson@sfu.ca](mailto:michelle_patterson@sfu.ca)  
Tel.: 778-782-5279

Akm Moniruzzaman, PhD  
Research Associate  
Simon Fraser University

Charles J. Frankish, PhD  
Professor  
University of British Columbia  
School of Population and Public Health

Julian M. Somers, PhD  
Associate Professor  
Simon Fraser University

**Key words:** homelessness, mental illness, learning disabilities



Learning problems and disabilities

## ABSTRACT

**Objectives.** It is well documented that early learning problems and poor academic achievement adversely impact child development and a wide range of adult outcomes; however, these indicators have received scant attention among homeless adults. This study examines self-reported learning disabilities in childhood as predictors of duration of homelessness, mental and substance use disorders, physical health, and service utilization in a sample of homeless adults with current mental illness.

**Design:** This study was conducted using the baseline sample from a randomized controlled trial.

**Setting:** Participants were sampled from the community in Vancouver, British Columbia.

**Participants:** The total sample included 497 adult participants who met criteria for absolute homelessness or precarious housing and a current mental disorder based on a structured diagnostic interview. Learning disabilities in childhood were assessed by asking adult participants whether they thought they had a learning disability in childhood and if anyone had told them they had a learning disability. Only participants who responded positively to both questions (n=133) were included in the analyses.

**Outcome measures.** Primary outcomes include current mental disorders, substance use disorders, physical health, service utilization and duration of homelessness.

**Results.** In multivariable regression models, self-reported learning disability during childhood independently predicted self-reported educational attainment and lifetime duration of homelessness as well as a range of mental health, physical health, and substance use problems, but did not predict reported health or justice service utilization.

**Conclusions.** Childhood learning problems are overrepresented among homeless adults

1 Learning problems and disabilities

2  
3 with complex comorbidities and long histories of homelessness. Our findings are  
4  
5 consistent with a growing body of literature indicating that adverse childhood events are  
6  
7  
8 potent risk factors for a number of adult health and psychiatric problems, including  
9  
10 substance abuse. Results are discussed in the context of cumulative adversity and  
11  
12 problem behaviour theory.  
13

14  
15 **Trials registration number:** This trial has been registered with the International  
16  
17 Standard Randomised Control Trial Number Register and assigned ISRCTN42520374.  
18  
19  
20  
21  
22  
23  
24  
25  
26  
27  
28  
29  
30  
31  
32  
33  
34  
35  
36  
37  
38  
39  
40  
41  
42  
43  
44  
45  
46  
47  
48  
49  
50  
51  
52  
53  
54  
55  
56  
57  
58  
59  
60

Learning problems and disabilities

## ARTICLE SUMMARY

### Article focus

- The relationship between self-reported learning disability in childhood as a predictor of adult homelessness and associated health and service use outcomes among a cohort of adult who are homeless and have a mental disorder.
- Primary outcomes include current mental disorders, substance use disorders, physical health, service utilization and duration of homelessness.
- How homelessness and the myriad of associated negative health and social outcomes might be prevented.

### Key messages

- Childhood learning disabilities are overrepresented among homeless adults with complex comorbidities and predict a range of poor health outcomes in adulthood including mood and anxiety disorders, suicidal ideation, early and severe substance use, and physical health problems.
- Early risk factors are often longstanding and drive a trajectory of cumulative risk, potentially leading to severe psychopathology and social exclusion.

### Strengths and limitations of this study

- Strengths include a large sample size, a diverse recruitment strategy, and structured diagnostic interviews for mental disorders.
- Limitations include retrospective self-report of childhood learning disabilities.
- Lack of access to early trauma and family dysfunction variables as well as measures of general cognitive impairment at baseline.

1 Learning problems and disabilities  
2  
3  
4

5  
6 **INTRODUCTION**  
7

8 Efforts to prevent homelessness require an understanding of the underlying causes and  
9  
10 early indicators of risk. Research into the causes of homelessness suggests complex  
11  
12 interactions between structural and individual factors, both of which are often present  
13  
14 long before the onset of first homelessness.[1-2] The childhoods of homeless adults are  
15  
16 disproportionately characterized by persistent poverty, residential mobility, school  
17  
18 problems, and other stressful and/or traumatic experiences[3-5] particularly among  
19  
20 homeless individuals with severe mental illness.[2]  
21  
22  
23

24  
25 While a growing body of research has examined the relationship between adverse  
26  
27 childhood events and subsequent homelessness,[3, 4] few studies have examined the role  
28  
29 of childhood learning disabilities. There is growing evidence that academic problems in  
30  
31 school foreshadow later educational and employment difficulties and may affect multiple  
32  
33 domains of functioning.[6]  
34  
35

36  
37 In Canada, educational policies fall under provincial jurisdiction, therefore,  
38  
39 definitions of learning disabilities (LD) vary widely and include learning problems,  
40  
41 difficulties, disorders, as well as “children at risk.”[7] LD are assumed to be neurological  
42  
43 in origin and affect the acquisition, organization, retention, understanding or use of verbal  
44  
45 and/or nonverbal information.[8] According to Statistics Canada, 4.9% of children aged  
46  
47 6 to 15 have a LD, varying from 1.6% for children aged 6 to 7.2% among 10-year-  
48  
49 olds.[9]  
50  
51

52  
53 While the consequences of LD on childhood academic and social development are  
54  
55 well documented,[10, 11] the impact in adulthood is challenging to assess. However,  
56  
57  
58  
59  
60

1 Learning problems and disabilities

2  
3 research suggests that LD often persist into adulthood and affect diverse aspects of  
4  
5 functioning including employment, social relationships, quality of life, and mental and  
6  
7 physical health.[12]  
8  
9

10 In school settings, LD typically manifest as poor academic achievement, which is  
11 associated with a greater number of school absences, suspensions, and grade retention as  
12 well as externalizing and internalizing behaviour problems.[7-10] Almost one-third of  
13 US adolescents with LD in the National Longitudinal Transition Study did not complete  
14 high school and were less likely to enroll in subsequent vocational or academic programs  
15 compared to their non-LD peers.[10]  
16  
17  
18  
19  
20  
21  
22  
23

24 Research examining substance abuse among youth with LD remains  
25 inconclusive.[13] Beitchman et al.[11] assessed 264 Canadian children for LD at ages 12  
26 and 19, and for psychiatric and substance use disorders at age 19. Children who met  
27 criteria for LD at ages 12 and 19 were more likely to develop a psychiatric or substance  
28 use disorder compared to non-LD children at both time points. LD at 19 years of age  
29 increased the risk for substance use disorder three-fold after controlling for behavioural  
30 problems and family structure. Difficulties with executive functioning, academic failure,  
31 low self-esteem, and poor social skills are viewed as the strongest predictors of substance  
32 use disorder.[14]  
33  
34  
35  
36  
37  
38  
39  
40  
41  
42  
43  
44

45 Compared to non-LD peers, youth with LD frequently report feelings of loneliness,  
46 stress, depression, and suicide, among other psychiatric symptoms.[15, 16] For example,  
47 in the National Longitudinal Study of Adolescent Health, the LD sample was twice as  
48 likely to report a suicide attempt in the past year.[16] Longitudinal research on risk-  
49 taking indicates that, compared to non-LD peers, adolescents with LD engage more  
50  
51  
52  
53  
54  
55  
56  
57  
58  
59  
60

1 Learning problems and disabilities

2  
3 frequently in various risk behaviours.[17] Therefore, the presence of LD in childhood  
4  
5 appears to confer a general risk for adverse outcomes throughout adolescence and into  
6  
7 adulthood.  
8  
9

10 In identifying early indicators for homelessness, we are posing a larger question  
11  
12 about how we might prevent homelessness and the myriad of associated negative health  
13  
14 and social outcomes. There has been a resurgence of interest in early intervention as a  
15  
16 means of preventing or attenuating a wide range of developmental outcomes in  
17  
18 adulthood.[18] In this study, we focus on the relationship between early LD as a  
19  
20 predictor of adult homelessness and associated health and service use outcomes. Unlike  
21  
22 family instability and dysfunction, which fall under the jurisdiction of child welfare  
23  
24 agencies, LD can be identified and addressed within the school system and may serve as  
25  
26 an early marker of social and developmental risk.  
27  
28  
29  
30

### 31 **METHODS**

32  
33 The Vancouver At Home Project is a randomized controlled trial (RCT) involving  
34  
35 homeless adults with mental illness in Vancouver, British Columbia. Study design and  
36  
37 sample size were determined by the At Home/Chez Soi National Research Team which  
38  
39 monitored activities at five different study sites.[19] Details related to the RCT protocol  
40  
41 such as CONSORT have been reported elsewhere[19]. The current study focuses on  
42  
43 baseline data from one study site (Vancouver) prior to randomization and does not  
44  
45 incorporate any findings related to RCT elements.  
46  
47  
48  
49

50 Eligibility criteria included legal adult status (19 years and older), current mental  
51  
52 disorder on the MINI Neuropsychiatric Interview (MINI),[20] and being absolutely  
53  
54 homeless or precariously housed. Absolute homelessness was defined as living on the  
55  
56  
57  
58  
59  
60

1 Learning problems and disabilities

2  
3 streets or in an emergency shelter for at least the past seven nights with little likelihood of  
4  
5 obtaining secure accommodation in the upcoming month. Precariously housed was  
6  
7 defined as living in a rooming house, hotel or other transitional housing; in addition,  
8  
9 individuals must have experienced at least two episodes of absolute homelessness in the  
10  
11 past year, or one episode lasting for at least four weeks in the past year.  
12  
13

14  
15 Participants were recruited through referral from over 40 agencies available to  
16  
17 homeless adults in Vancouver; the majority were recruited from homeless shelters, drop-  
18  
19 in centres, homeless outreach teams, hospitals, community mental health teams, and  
20  
21 criminal justice programs. We specifically targeted organizations that serve women,  
22  
23 youth, aboriginal peoples, and gay/lesbian/transgender individuals in order to obtain as  
24  
25 diverse and representative a sample as possible. Referral was initiated by service  
26  
27 providers and a preliminary screening for eligibility was conducted via telephone with the  
28  
29 referral agent. All participants met face-to-face with a trained research interviewer who  
30  
31 explained procedures, obtained informed consent, and confirmed study eligibility. A  
32  
33 cash honorarium of \$5 was provided for the screening process. Institutional ethics board  
34  
35 approval was obtained through Simon Fraser University and the University of British  
36  
37 Columbia.  
38  
39  
40  
41  
42

43  
44 Approximately 85 individuals were turned away on the phone because they  
45  
46 clearly did not meet eligibility criteria. In addition, approximately 100 individuals were  
47  
48 invited to meet with an interviewer for further eligibility screening and/or to begin the  
49  
50 baseline questionnaire but did not show up for an appointment. Whenever possible,  
51  
52 appointments were rescheduled and interviewers tried to locate individuals in the  
53  
54 community. Finally, 92 recruits completed the formal eligibility screening process but  
55  
56  
57  
58  
59  
60

Learning problems and disabilities

1  
2  
3 were deemed ineligible. When these individuals were compared with participants who  
4  
5 were enrolled in the study, no significant differences were found in terms of current age  
6  
7 or gender.  
8  
9

10  
11 If the individual met all study criteria, they were enrolled as a participant and the  
12  
13 baseline interview commenced, consisting of a series of interviewer-administered  
14  
15 questionnaires including socio-demographic characteristics, psychiatric symptoms,  
16  
17 substance use, physical health, service use, and quality of life. Participants received a  
18  
19 further cash honorarium of \$30 upon completion of the baseline interview. The  
20  
21 following analyses are based upon data from the baseline questionnaires of 497  
22  
23 participants recruited from October 2009 to June 2011.  
24  
25  
26  
27

### 28 29 **Variables of interest**

30  
31  
32 LD were assessed using the following questions, focusing on childhood: (1) “Do  
33  
34 you think you had a learning problem or learning disability?” and (2) “Did anyone ever  
35  
36 tell you that you have a learning problem or learning disability?” Given the retrospective  
37  
38 nature of these questions, only participants who responded positively to both questions  
39  
40 were included in the analysis.  
41  
42  
43

44  
45 With regard to mental disorders, Severe Cluster includes at least one of current  
46  
47 Psychosis, Mood Disorder with Psychotic Features, and Hypomanic or Manic Episode, as  
48  
49 identified through the MINI or documented physician diagnosis. Less Severe Cluster  
50  
51 includes at least one of current Major Depressive Episode, Panic Disorder, and Post-  
52  
53 traumatic Stress Disorder. Suicidality, Alcohol Dependence, and Substance Dependence  
54  
55 were also identified using the MINI. Frequency and type of substance use over the past  
56  
57  
58  
59  
60



1 Learning problems and disabilities

2  
3 month were recorded using the Maudsley Addiction Profile (MAP).[21] Physical illness  
4  
5 was assessed by self-report using a checklist of 30 chronic health conditions (lasting  
6  
7 longer than six months). Blood-borne infectious disease consisted of positive self-report  
8  
9 diagnosis of HIV, Hepatitis B or Hepatitis C. Head injury status was based on the  
10  
11 question “Did you ever receive a head injury that left you unconscious?” Shoplifting and  
12  
13 selling drugs were assessed during the past month using the MAP.  
14  
15  
16  
17

18  
19 Self-reported involvement with health services was collected for the past six  
20  
21 months including visiting and talking to a health or service provider, Emergency Room  
22  
23 visits, and being transported by ambulance. Criminal justice services included contact  
24  
25 with the police that resulted in detention, arrest and court appearances. The Multnomah  
26  
27 Community Ability Scale (MCAS)[22] quantifies community functioning based on 17  
28  
29 items and was scored by the interviewer upon completion of the baseline interview.  
30  
31  
32

### 33 **Statistical analyses**

34  
35 Comparisons of categorical data between participants who did or did not report a  
36  
37 learning problem or disability were conducted using Pearson’s chi-square or Fisher’s  
38  
39 exact test. Comparisons of numeric variables (e.g., age at enrolment) between groups  
40  
41 were conducted using the Student t test and Wilcoxon’s rank-sum test. Univariate and  
42  
43 multivariable logistic regression analyses were used to model the independent  
44  
45 associations between childhood LD and a series of a priori outcome variables. Outcomes  
46  
47 variables that were significant at the  $p \leq 0.10$  level were considered for univariate and  
48  
49 multivariable logistic regression analyses. Each variable was modeled in both univariate  
50  
51 and multivariate settings using childhood LD as an independent risk factor and the same  
52  
53 set of controlling variables (age at enrolment, age of first homelessness, gender, ethnicity,  
54  
55  
56  
57  
58  
59  
60

1 Learning problems and disabilities

2  
3 marital status, and language spoken in the childhood home). Both unadjusted and  
4  
5 adjusted odds ratios and 95% confidence intervals (CI) are reported and all p-values are  
6  
7 two-sided. SPSS-19 was used to conduct these analyses. Missing values ranged from  
8  
9 zero to 4% and were excluded from the analyses.  
10  
11

## 12 13 **RESULTS**

14  
15  
16 In total, 497 participants completed the baseline questionnaire; 178 participants (36%)  
17  
18 thought they had a learning problem or disability in childhood, 182 (37%) reported being  
19  
20 told they had a learning problem or disability, and 133 (27%) responded positively to  
21  
22 both indicators of childhood LD. The majority of the total sample was male (73%) and  
23  
24 Caucasian (56%); the mean age at enrollment was 40.8 (SD=11.0) years; and the mean  
25  
26 age when first homeless was 30.3 (SD=13.3) years. The median duration of lifetime  
27  
28 homelessness was 36 months (IQR: 12-84 months). All bivariate comparisons by  
29  
30 childhood LD are summarized in Tables 1 to 3. Tables 1 and 2 present demographic  
31  
32 characteristics and current mental disorder status of participants by childhood LD status  
33  
34 (yes vs. no).  
35  
36  
37  
38

39  
40 [Insert Tables 1 and 2 about here]  
41

42  
43 Table 3 presents self-reported substance use (past month) and service use (past six  
44  
45 months) characteristics by childhood LD status. Participants who reported having a  
46  
47 childhood LD were significantly more likely to report a number of negative health  
48  
49 outcomes related to physical health (i.e., blood-borne infectious diseases, migraine, and  
50  
51 seizures), mental health (i.e., major depressive episode, panic disorder, high suicidality)  
52  
53 and substance use (i.e., alcohol dependence, early initiation of drug use, daily drug use,  
54  
55 and injection drug use).  
56  
57  
58  
59  
60

1 Learning problems and disabilities

2  
3 [Insert Table 3 about here]

4  
5 Unadjusted (UOR) and adjusted odds ratios (AOR) and 95% CI for variables  
6 included in the univariate and multivariable analyses are presented in Table 4. Results  
7 from the multivariable logistic regression analyses indicate that reporting a childhood LD  
8 independently predicted not entering high school (AOR: 2.21), lifetime duration of  
9 homelessness greater than three years (AOR: 1.90), current major depressive episode  
10 (AOR: 1.64), panic disorder (AOR: 1.86), alcohol dependence (AOR: 1.69), high  
11 suicidality (AOR: 1.93), less severe cluster of mental disorders (AOR: 1.95), two or more  
12 mental disorders (AOR: 2.06), infectious disease (AOR: 1.75), migraine (AOR: 2.50),  
13 seizures (AOR: 2.23), head injury (AOR: 2.23), poor or fair overall health (AOR: 1.90),  
14 injection drug use (AOR: 2.01), daily drug and alcohol use (AOR: 1.70), daily drug use  
15 (not including alcohol) (AOR: 1.77), daily hard drug use (not including alcohol or  
16 marijuana) (AOR: 1.79), early initiation of drug use (<14 years) (AOR: 1.60), shoplifting  
17 in the past six months (AOR: 2.31), and talking to a health or social service provider in  
18 the past six months (AOR: 2.00).

19  
20 [Insert Table 4 about here]

## 21 **DISCUSSION**

22 Our multivariable models identified several factors that were associated with self-  
23 reported childhood LD in a cohort of adults who are homeless and have a mental  
24 disorder: longer lifetime duration of homelessness; less severe mental disorders as well as  
25 multiple mental disorders and high suicidal ideation; early and severe substance use,  
26 including injection drug use and daily use of both drugs and alcohol; and physical health  
27 problems including infectious disease, head injury, multiple illnesses, and rating ones'

1 Learning problems and disabilities

2  
3 overall health as fair or poor. Despite the complex health needs of this sub-group, the  
4  
5 only service use variable that was predicted by childhood learning problems or  
6  
7 disabilities was very generic: talking to a health or social service provider in the past six  
8  
9 months. A range of criminal justice variables as well as emergency room, ambulance  
10  
11 utilization, and various other health services were not significant in our analyses.  
12  
13

14  
15 Collectively, our results indicate that childhood LD are overrepresented among homeless  
16  
17 adults with complex comorbidities and predict a range of poor health outcomes in  
18  
19 adulthood.  
20

21  
22 These findings support previous research demonstrating a link between poor  
23  
24 academic achievement and the psychological adversity faced by some adults.[6, 23]  
25  
26 Studies of homeless and highly mobile children have identified that both groups show  
27  
28 slower learning and academic progress than their residentially stable peers.[23] However,  
29  
30 the risk of homelessness among people with LD has received scant attention in the  
31  
32 research literature.[24, 25] Among our sample of homeless adults, 41% did not graduate  
33  
34 from high school and 43% reported being in a special class in school, suggesting that  
35  
36 learning and academic achievement was challenging throughout their school years and  
37  
38 likely persists in adulthood in the form of poor literacy skills and difficulties finding and  
39  
40 maintaining employment.  
41  
42  
43  
44

45  
46 Our index of LD does not discriminate between focal and more general cognitive  
47  
48 difficulties, nor did we assess the presence of LD in adulthood. Several studies have  
49  
50 found increased rates of general cognitive impairment among homeless adults compared  
51  
52 to housed comparison groups.[26, 27] In our sample of homeless adults with current  
53  
54 mental disorders, 66% reported experiencing a head injury that left them unconscious.  
55  
56  
57  
58  
59  
60

1 Learning problems and disabilities

2  
3 However, these injuries may have occurred in adulthood and it is well documented that  
4  
5 homeless adults are more likely to experience a variety of accidents compared to housed  
6  
7 counterparts.[27] It is also possible that childhood LD among our sample were related to  
8  
9 psychological distress in the home.[24] Regardless of the origin of learning problems  
10  
11 among homeless adults, it appears that they persist over time and are associated with  
12  
13 significant functional impairment.  
14  
15

16  
17 Childhood LD independently predicted a range of substance use problems in our  
18  
19 adult sample, including early initiation of drug use (before age 14). Abuse of alcohol and  
20  
21 other drugs places an individual at greater risk of homelessness, but is not a direct causal  
22  
23 factor.[28] Along with other studies, our findings suggest that daily drug use is a  
24  
25 common mediator for a range of early risk factors.[29] Previous research using our  
26  
27 sample of homeless adults with mental disorders found that daily drug use significantly  
28  
29 predicts duration of homelessness[30] as well as severity of mental health symptoms.[31]  
30  
31  
32  
33

34 Cross-sectional, retrospective data cannot disentangle the unique predictors of  
35  
36 homelessness and mental illness, but it is likely that negative childhood experiences have  
37  
38 both direct and indirect (mediated by substance use) effects on participants' history of  
39  
40 homelessness. Documentation of these underlying common factors points to a broad  
41  
42 range of vulnerabilities for homelessness and mental illness. These common factors  
43  
44 increase the complexity of personal problems as well as the duration of  
45  
46 homelessness.[30] Therefore, substance dependence, especially when concurrent with  
47  
48 mental illness among homeless populations, is not only a clinical problem but also a  
49  
50 critical indicator for a range of other social and psychological problems that may need to  
51  
52 be addressed before homelessness can be resolved.  
53  
54  
55  
56  
57  
58  
59  
60

## Learning problems and disabilities

1  
2  
3  
4  
5  
6  
7  
8  
9  
10  
11  
12  
13  
14  
15  
16  
17  
18  
19  
20  
21  
22  
23  
24  
25  
26  
27  
28  
29  
30  
31  
32  
33  
34  
35  
36  
37  
38  
39  
40  
41  
42  
43  
44  
45  
46  
47  
48  
49  
50  
51  
52

Problems such as homelessness that have long developmental trajectories, are perhaps best understood from models of cumulative adversity and amplification of risk.[32,33] Based on life course development and social learning theory, the risk amplification model addresses mechanisms through which experiences on the street amplify negative developmental effects originating in the family. According to this model, harmful behaviours and negative self-concept are perpetuated by the progressive accumulation of their own consequences. Thus, homelessness can be understood as the result of a developmental trajectory defined by successive environmental disruptions, each of which places individuals at greater risk for homelessness and associated risk factors. Individuals generally become homeless after experiencing a crisis due to limited income, social support, and personal coping skills.[5, 28] However, it is unclear what leads some people to become homeless while others do not. The risk amplification model may apply primarily to subgroups who are most vulnerable to a variety of structural contributors to homelessness such as poverty and the lack of affordable housing. Problem Behaviour Theory[34, 35] suggests that various risk factors may comprise a cluster of risky behaviours that mediate the link from childhood adversity to illicit drug use in adulthood, rather than distinct independent pathways. Another potential pathway linking childhood adversity to adult homelessness is the likelihood that such adversity elevates individuals' risk for psychiatric disorders such as depression and substance abuse, which are risk factors for homelessness, by reducing one's ability to earn adequate income and maintain stable housing.

## 53 Implications

54  
55  
56  
57  
58  
59  
60

1 Learning problems and disabilities

2  
3 The growing body of research that suggests a trajectory of risk preceding the first episode  
4 of homelessness begs the question “Can outcomes such as homelessness be prevented?”  
5  
6

7  
8 In addition to addressing structural barriers such as income inequality and affordable  
9 housing, many researchers and policy makers have called for comprehensive preventive  
10 interventions for high-risk children in public and community settings.[36, 37] Supporting  
11 children’s cognitive development and schooling is particularly important and early  
12 childhood education programs should be available for children at greatest risk. High risk  
13 includes established indicators such as early learning problems, abuse and/or neglect,  
14 behavioural and emotional problems, and early substance use. From a public health  
15 perspective, early interventions in childhood might change or moderate the cycle of  
16 homelessness across generations because early risk factors are often longstanding and  
17 drive a trajectory of cumulative risk, potentially leading to severe psychopathology and  
18 social exclusion. Despite the need for early intervention, our study also highlights the  
19 need for identifying and addressing current learning problems among homeless adults.  
20  
21 Learning problems may contribute to challenges with print and financial literacy,  
22 obtaining and maintaining housing and employment, and a wide range of daily living  
23 skills.  
24  
25  
26  
27  
28  
29  
30  
31  
32  
33  
34  
35  
36  
37  
38  
39  
40  
41  
42

### 43 **Limitations**

44  
45 Despite the strengths of our study design (i.e., large sample size, diverse recruitment  
46 strategy, structured diagnostic interviews), several limitations must be considered. First,  
47 all variables were based on participant self-report. Given that participants were selected  
48 based on current mental disorder, accuracy of recall may have been compromised.  
49  
50 Furthermore, participants were interviewed before being randomized to a housing  
51  
52  
53  
54  
55  
56  
57  
58  
59  
60

Learning problems and disabilities

1  
2  
3 intervention, therefore, some may have modified their responses in an attempt to  
4  
5 influence the outcome of randomization. In addition, at baseline, we did not have access  
6  
7 to early trauma or family dysfunction variables. Given the association between early  
8  
9 trauma, foster care placements and adult homelessness,[2] it will be important to further  
10  
11 examine the impact of these variables on later health and social outcomes. Similarly, we  
12  
13 did not have access to measures of current LD or general cognitive impairment at  
14  
15 baseline. Examination of current cognitive impairment, particularly as it relates to early  
16  
17 learning problems, may shed light on current health and social functioning.  
18  
19  
20  
21

### 22 **Future directions**

23  
24 Early indicators of risk clearly cannot explain all cases of homelessness. Many people  
25  
26 without early risk factors become homeless and many who experience risk do not become  
27  
28 homeless. Further research is needed to examine what differentially places people at risk  
29  
30 for risk.[38] We need better theory and better data to understand how social factors  
31  
32 regulate behaviours or distribute individuals into risk groups and how those social factors  
33  
34 ‘push’ individual trajectories toward or away from adverse outcomes. However, our  
35  
36 results linking early learning problems to homelessness, mental illness and substance use  
37  
38 are consistent with a growing body of research indicating that adverse childhood events  
39  
40 are potent risk factors for a number of psychiatric and substance use disorders.[6]  
41  
42  
43  
44

45  
46 Real prevention with regard to homelessness and other social problems will  
47  
48 require systemic social and policy changes that address the environments within which  
49  
50 children adapt so that they can mature into well-functioning adults. Nonetheless, our  
51  
52 findings, along with others’, outline a risk profile that can guide future research into  
53  
54 mechanisms and pathways through which childhood risks are translated into adult  
55  
56  
57  
58  
59  
60



1 Learning problems and disabilities

2  
3 sequelae. Interventions that can effectively address childhood risk factors such as  
4  
5 learning problems and disabilities may ultimately prevent critical social problems  
6  
7 including homelessness and the enormous social and individual costs related to these  
8  
9 problems.  
10  
11

## 12 **ACKNOWLEDGEMENTS**

13  
14 The authors thank the At Home/Chez Soi Project collaborative at both national and local  
15  
16 levels; National project team: J. Barker, PhD (2008–2011) and C. Keller, National Project  
17  
18 Leads; P. Goering, RN, PhD, Research Lead; approximately 40 investigators from across  
19  
20 Canada and the US; 5 site coordinators; numerous service and housing providers; and  
21  
22 persons with lived experience.  
23  
24  
25

## 26 **DECLARATION OF INTERESTS**

27  
28 This research was funded by Health Canada and the Mental Health Commission of  
29  
30 Canada. The views expressed herein solely represent the authors.  
31  
32  
33

## 34 **REFERENCES**

- 35  
36 1 Shinn M. International homelessness: Policy, socio-cultural, and individual  
37  
38 perspectives. *J Soc Issues* 2007;**63**(3):657-677.  
39  
40  
41 2 Sullivan G, Burnam A, Koegel P. Pathways to homelessness among the mentall ill. *Soc*  
42  
43 *Psychiatry Epidemiol* 2000;**35**:444-450.  
44  
45  
46 3 Herman D, Susser ES, Struening EL, Link BL. Adverse childhood experiences: are  
47  
48 they risk factors for adult homelessness? *Am J Public Health* 1997;**87**(2):249-255.  
49  
50  
51 4 Koegel P, Malamid E, Burnam MA. Childhood risk factors for homelessness among  
52  
53 homeless adults. *Am J Public Health* 1995;**85**(12):1642-1649.  
54  
55  
56  
57  
58  
59  
60

Learning problems and disabilities

1  
2  
3 5 Lehmann ER, Kass PH, Drake CM, Nichols SB. Risk factors for first-time  
4 homelessness in low-income women. *Am J Orthopsychiatry* 2007;**77**(1):20-28.  
5  
6

7  
8 6 Masten A, Long JD, Roisman G, Burt K, Obradovic J, Roberts M, et al. Developmental  
9 cascades: linking academic achievement, externalizing and internalizing symptoms over  
10 20 years. *Dev Psychol* 2005;**41**:733-746.  
11  
12

13  
14 7 Wiener J, Siegel L. A Canadian perspective on learning disabilities. *J Learn Disabil*  
15 1992;**25**(6):340-350.  
16  
17

18  
19 8 Ferrari M. A comparative assessment of the cognitive functioning of adults with  
20 childhood histories of learning disability and adults with neurocognitive disorders. *J Dev*  
21 *Phys Disabil* 2009;**21**:355-368.  
22  
23

24  
25 9 Statistics Canada. The daily release 2007. Available at  
26  
27 <http://www.statcan.ca/Daily/English/071203/d071203a.htm>. Retrieved on April 25, 2012.  
28  
29

30  
31 10 Blackorby J, Wagner M. Longitudinal postschool outcomes of youth with disabilities:  
32 findings from the National Longitudinal Transition Study. *Except Child* 1996;**62**(5):399-  
33 413.  
34  
35

36  
37 11 Beitchman JH, Wilson B, Douglas L, Young A, Adlaf E. Substance abuse disorders in  
38 young adults with and without LD: predictive and concurrent relationships. *J Learn*  
39 *Disabil* 2001;**34**(4):317-332.  
40  
41

42  
43 12 Gerber PJ. The impact of learning disabilities on adulthood: a review of the  
44 evidenced-based literature for research and practice in adult education. *J Learn Disabil*  
45 2012;**45**(1):31-46.  
46  
47  
48  
49  
50  
51  
52  
53  
54  
55  
56  
57  
58  
59  
60

1 Learning problems and disabilities

2  
3 13 Janusis GM, Weyandt LL. An exploratory study of substance use and misuse among  
4 college students with and without ADHD and other disabilities. *J Atten Disord* 2010;  
5  
6  
7  
8 14(3):205-215.

9  
10 14 Weinberg NZ. Risk factors for adolescent substance abuse. *J Learn Disabil* 2001;  
11  
12  
13 34(4):343-351.

14  
15 15 Buysse V, Goldman B, Skinner ML. Seeing effects on friendship formation among  
16 young children with and without learning disabilities. *Except Child* 2003;68(4):503-517.

17  
18 16 Svetaz M, Ireland M, Blum R. Adolescents with learning disabilities: risk and  
19 protective factors associated with emotional well-being. *J Adol Health* 2000;27:340-348.

20  
21 17 McNamara JK, Willoughby T. A longitudinal study of risk-taking behavior in  
22 adolescents with learning disabilities. *Learn Disabil Res Prac* 2010;25(1):11-24.

23  
24 18 Ben-Shlomo Y, Kuh D. A life course approach to chronic disease epidemiology:  
25 conceptual models, empirical challenges and interdisciplinary perspectives. *Int J*  
26  
27  
28  
29  
30  
31  
32  
33  
34  
35  
36  
37  
38  
39  
40  
41  
42  
43  
44  
45  
46  
47  
48  
49  
50  
51  
52  
53  
54  
55  
56  
57  
58  
59  
60  
*Epidemiol* 2002;341(2):285-293.

19 Goering PN, Streiner DL, Adair C, Aubry T, Barker J, Distasio J,  
et al. The At Home/Chez Soi trial protocol: a pragmatic, multi-site, randomised  
controlled trial of a Housing First intervention for homeless individuals with mental  
illness in five Canadian cities. *BMJ Open* 2011;1(2):e000323.

20 Sheehan DV, Lecrubier Y, Sheehan KH, Amorim P, Janavs J, Weiller E. et al. The  
Mini-International Neuropsychiatric Interview (M.I.N.I.): The development and  
validation of a structured diagnostic psychiatric interview for DSM-IV and ICD-10. *J*  
*Clin Psychiatry* 1998;59(Suppl 20):22-33.

Learning problems and disabilities

21 Marsden J, Gossop M, Stewart D, Best D, Farrell M, Strang, J. *The Maudsley Addiction Profile (MAP): A brief instrument for treatment outcome research.*

*Development and User Manual.* London UK: National Addiction Centre/Institute of Psychiatry 1998. Available at:

[http://www.iop.kcl.ac.uk/iopweb/blob/downloads/locator/l\\_346\\_MAP.pdf](http://www.iop.kcl.ac.uk/iopweb/blob/downloads/locator/l_346_MAP.pdf). Accessed April 25, 2012.

22 Barker S., Barron N., McFarland B.H., et al. A community ability scale for chronically mentally ill consumer. *Community Ment Health J* 1994;**30**:459-472.

23 Obradovic J, Long JD, Cutuli JJ, Chan C, Hinz E, Heistad D, Masten A. Academic achievement of homeless and highly mobile children in an urban school district: longitudinal evidence on risk, growth, and resilience. *Dev Psychopathol* 2009;**21**:493-518.

24 Trueland J. People with learning disabilities hidden among the homeless. *Learn Dis Prac* 2009;**12**(2):18-20

25 Spence S, Stevens R, Parks R. Cognitive dysfunction in homeless adults: a systematic review. *J R Soc Med* 2004;**97**:375-379.

26 Bousman C, Twamley E, Vella L, Gale M, Norman S, Judd P, et al. Homelessness and neuropsychological impairment: preliminary analysis of adults entering outpatient psychiatric treatment. *J Nerv Ment Dis* 2010;**198**(11):790-794.

27 Hwang SW, Colantonio A, Chiu S, Tolomiczenko G, Kiss A, Cowan L, et al. The effect of traumatic head injury on the health of homeless people. *Can Med Assoc J* 2008;**179**(8):779-784.

1 Learning problems and disabilities

2  
3 28 Sosin MR, Bruni M. Homelessness and vulnerability among adults with and without  
4 alcohol problems. *Subst Use Misuse* 1997;**32**(7-8):939-968.

5  
6  
7 29 Brook DW, Brook JS, Zhang C, Cohen P, Whiteman M. Drug use and the risk of  
8 major depressive disorder, alcohol dependence, and substance use disorder. *Arch Gen*  
9  
10  
11  
12  
13 *Psychiatry* 2002;**59**(11):1039-1044.

14  
15 30 Patterson M, Somers JM, Moniruzzaman A. Prolonged and persistent homelessness:  
16  
17  
18  
19  
20  
21  
22  
23  
24  
25  
26  
27  
28  
29  
30  
31  
32  
33  
34  
35  
36  
37  
38  
39  
40  
41  
42  
43  
44  
45  
46  
47  
48  
49  
50  
51  
52  
53  
54  
55  
56  
57  
58  
59  
60  
Multivariable analyses in a cohort experiencing current homelessness and mental illness  
in Vancouver, British Columbia. *Ment Health Subst Use* 2012;**5**(2):85-101.

31  
32  
33  
34  
35  
36  
37  
38  
39  
40  
41  
42  
43  
44  
45  
46  
47  
48  
49  
50  
51  
52  
53  
54  
55  
56  
57  
58  
59  
60  
31 Palepu A, Patterson M, Strehlau V, Moniruzzaman A, tan de Bibiana J, et al. Daily  
Substance Use and Mental Health Symptoms among a cohort of Homeless Adults in  
Vancouver, British Columbia. *J Urban Health*, in press.

32  
33  
34  
35  
36  
37  
38  
39  
40  
41  
42  
43  
44  
45  
46  
47  
48  
49  
50  
51  
52  
53  
54  
55  
56  
57  
58  
59  
60  
32 Paradise M, Cause AM, Ginzler J, Wert S, Wruck K, Brooker M. The role of  
relationships in developmental trajectories of homeless and runaway youth. In: Sarason,  
BR, Duck S, eds. *Personal relationships: Implications for clinical and community*  
*psychology*. NY: John Wiley & Sons Ltd 2001:159-179.

33  
34  
35  
36  
37  
38  
39  
40  
41  
42  
43  
44  
45  
46  
47  
48  
49  
50  
51  
52  
53  
54  
55  
56  
57  
58  
59  
60  
33 Padgett D, Smith BT, Henwood B, Tiderington E. Life course adversity in the lives of  
formerly homeless persons with serious mental illness: context and meaning. *Am J*  
*Orthopsych* 2012;**82**:421-430.

34  
35  
36  
37  
38  
39  
40  
41  
42  
43  
44  
45  
46  
47  
48  
49  
50  
51  
52  
53  
54  
55  
56  
57  
58  
59  
60  
34 Jessor R. Risk behavior in adolescence: a psychosocial framework for understanding  
and action. *J Adol Health* 1991;**12**:597-605.

35  
36  
37  
38  
39  
40  
41  
42  
43  
44  
45  
46  
47  
48  
49  
50  
51  
52  
53  
54  
55  
56  
57  
58  
59  
60  
35 Jessor R, Jessor SL. *Problem Behavior and Psychosocial Development: A*  
*Longitudinal Study of Youth*. NY: Academic Press 1977.

1 Learning problems and disabilities

2  
3 36 Lee SS, August GJ, Gewirtz A, Klimes-Dougan B, Bloomquist M, Realmuto G.

4  
5 Identifying unmet mental health needs in children of formerly homeless mothers living in  
6 a supportive housing community sector of care. *J Abnorm Child Psychol* 2010;**38**:421-  
7  
8 432.

9  
10  
11 37 Shinn M, Schteingart JS, Williams NC, Carlin-Mathis J, Bialo-Karagis N, Becker-  
12  
13 Klein R, et al. Long-term associations of homelessness with children's well-being. *Am*  
14  
15 *Behav Sci* 2008;**51**(6):798-809.

16  
17  
18 38 Link B, Phelan J. Social conditions as fundamental causes of disease. *J Health Soc*  
19  
20 *Beh* 1995;**35**:80-94.  
21  
22  
23  
24  
25  
26  
27  
28  
29  
30  
31  
32  
33  
34  
35  
36  
37  
38  
39  
40  
41  
42  
43  
44  
45  
46  
47  
48  
49  
50  
51  
52  
53  
54  
55  
56  
57  
58  
59  
60

## Learning problems and disabilities

Table 1: Comparisons of socio-demographic characteristics between participants who reported childhood learning problems or disabilities (LD-Yes; n=133) and those who did not (LD-No; n=364).<sup>1</sup>

| Variable                                                        | Total Sample<br>N (%) | LD-No<br>N (%) | LD-Yes<br>N (%) | p value  |
|-----------------------------------------------------------------|-----------------------|----------------|-----------------|----------|
| Male gender                                                     | 359 (73)              | 259 (72)       | 100 (76)        | 0.375    |
| Age at enrolment                                                |                       |                |                 | 0.001**  |
| 19-25 years                                                     | 36 (7)                | 25 (7)         | 11 (8)          |          |
| 25-44 years                                                     | 281 (57)              | 190 (52)       | 91 (68)         |          |
| Over 44 years                                                   | 180 (36)              | 149 (41)       | 31 (23)         |          |
| Ethnicity                                                       |                       |                |                 | 0.469    |
| Aboriginal                                                      | 77 (15)               | 52 (14)        | 25 (19)         |          |
| Caucasian                                                       | 280 (56)              | 208 (57)       | 72 (54)         |          |
| Other                                                           | 140 (28)              | 104 (29)       | 36 (27)         |          |
| Educational attainment ( $\leq$ Grade 8)                        | 76 (15)               | 44 (12)        | 32 (25)         | <0.001** |
| Single marital status                                           | 343 (70)              | 250 (69)       | 93 (70)         | 0.797    |
| Language spoken at home during childhood (English)              | 392 (79)              | 282 (77)       | 110 (83)        | 0.206    |
| Psychiatric hospitalization (past 5 years) longer than 6 months | 57 (12)               | 43 (12)        | 14 (11)         | 0.686    |
| Psychiatric hospitalization (past 5 years) 2 or more times      | 253 (53)              | 189 (54)       | 64 (50)         | 0.542    |
| Employment history (at least 1 year of continuous work)         | 323 (65)              | 243 (67)       | 80 (60)         | 0.138    |
| Jail (past 6 months)                                            | 68 (14)               | 46 (13)        | 22 (17)         | 0.262    |
| Duration of homelessness                                        |                       |                |                 |          |
| Total lifetime (>3 years)                                       | 234 (48)              | 155 (43)       | 79 (61)         | <0.001** |
| Longest single period (>1 year)                                 | 245 (50)              | 174 (48)       | 71 (55)         | 0.143    |
| Age of first homelessness (<25 years)                           | 214 (44)              | 143 (39)       | 71 (56)         | 0.001**  |
| Overall health (poor or fair)                                   | 235 (47)              | 161 (44)       | 74 (56)         | 0.026*   |
| MCAS total score (<56) #                                        | 244 (49)              | 177 (49)       | 67 (50)         | 0.730    |

<sup>1</sup> Each multivariable model was controlled for age (continuous measure), age of first homelessness age (continuous measure), gender, ethnicity (Aboriginals, Caucasian, Other), marital status (Single vs. Other) and language spoken in childhood home (English vs. Other).

# Dichotomized based on median value.

\*\*p $\leq$ 0.001

\*p $\leq$ 0.05

## Learning problems and disabilities

Table 2: Comparisons of mental disorders and physical illness between participants who reported childhood learning problems or disability (LD-Yes; n=133) and those who did not (LD-No; n=364).<sup>1</sup>

| Variable                              | Total sample<br>N (%) | LD-No<br>N (%) | LD-Yes<br>N (%) | p value  |
|---------------------------------------|-----------------------|----------------|-----------------|----------|
| <i>Mental Disorders (past month)</i>  |                       |                |                 |          |
| Major Depressive Episode              | 199 (40)              | 134 (37)       | 65 (49)         | 0.015*   |
| Manic or Hypomanic Episode            | 97 (20)               | 64 (18)        | 33 (25)         | 0.072+   |
| Post-traumatic Stress Disorder        | 129 (26)              | 88 (24)        | 41 (31)         | 0.122    |
| Panic Disorder                        | 104 (21)              | 64 (18)        | 40 (30)         | 0.002*   |
| Mood Disorder with Psychotic Features | 84 (17)               | 57 (16)        | 27 (20)         | 0.208    |
| Psychotic Disorder                    | 263 (53)              | 200 (55)       | 63 (47)         | 0.134    |
| Alcohol dependence                    | 121 (24)              | 79 (22)        | 42 (32)         | 0.023*   |
| Substance dependence                  | 288 (58)              | 205 (56)       | 83 (62)         | 0.224    |
| Two or more mental disorders          | 240 (48)              | 158 (43)       | 82 (62)         | <0.001** |
| High suicidality                      | 87 (18)               | 54 (15)        | 33 (25)         | 0.010+   |
| Less severe cluster                   | 264 (53)              | 176 (48)       | 88 (66)         | <0.001** |
| Severe cluster                        | 363 (73)              | 267 (73)       | 96 (72)         | 0.794    |
| <i>Physical Health</i>                |                       |                |                 |          |
| Migraine                              | 157 (32)              | 94 (26)        | 63 (48)         | <0.001** |
| Epilepsy or seizures                  | 67 (14)               | 40 (11)        | 27 (21)         | 0.006*   |
| Blood-borne infectious diseases       | 157 (32)              | 103 (29)       | 54 (41)         | 0.008*   |
| Head injury                           | 270 (56)              | 179 (51)       | 91 (71)         | <0.001** |
| Two or more physical conditions       | 402 (81)              | 287 (78.8)     | 115 (86)        | 0.056+   |

<sup>1</sup> Each multivariable model was controlled for age (continuous), age of first homelessness age (continuous), gender, ethnicity (Aboriginals, Caucasian, Other), marital status (Single vs. Other) and language spoken in childhood home (English vs. Other).

\*\*p≤0.001

\*p≤0.05

+ p≤0.10



## Learning problems and disabilities

Table 3: Comparisons of substance use and service utilization between participants who reported childhood learning problems or disability (LD-Yes; n=133) and those who did not (LD-No; n=364).<sup>1</sup>

| Variable                                       | Total sample<br>N (%) | LD-No<br>N (%) | LD-Yes<br>N (%) | p value |
|------------------------------------------------|-----------------------|----------------|-----------------|---------|
| <i>Substance Use (past month)</i>              |                       |                |                 |         |
| IV drug use                                    | 88 (18)               | 53 (15)        | 35 (27)         | 0.003*  |
| Daily substance use (including alcohol)        | 143 (29)              | 91 (25)        | 52 (39)         | 0.002*  |
| Daily drug use (no alcohol)                    | 126 (25)              | 78 (21)        | 48 (36)         | 0.001*  |
| Daily hard drug use (no alcohol, no marijuana) | 74 (15)               | 45 (12)        | 29 (22)         | 0.009*  |
| Daily alcohol use                              | 26 (5)                | 17 (5)         | 9 (7)           | 0.367   |
| Polysubstance use (no alcohol)                 | 188 (38)              | 128 (35)       | 60 (45)         | 0.050+  |
| Age first drunk (<14 years)                    | 212 (45)              | 142 (42)       | 70 (56)         | 0.007*  |
| Age of first drug use (<14 years)              | 178 (40)              | 114 (35)       | 64 (52)         | 0.001*  |
| Sold drugs                                     | 50 (10)               | 32 (9)         | 18 (14)         | 0.140   |
| Shop-lifting                                   | 62 (13)               | 34 (10)        | 28 (21)         | 0.001*  |
| <i>Service Use (past 6 months)</i>             |                       |                |                 |         |
| Psychiatrist                                   | 134 (27)              | 109 (30)       | 25 (19)         | 0.013*  |
| Addiction counselor                            | 18 (4)                | 10 (3)         | 8 (6)           | 0.084+  |
| Seen by a health/social service provider       | 384 (78)              | 276 (76)       | 108 (82)        | 0.204   |
| Talked with a health/social service provider   | 112 (23)              | 69 (19)        | 43 (32)         | 0.002*  |
| ER visit (yes/no)                              | 281 (58)              | 204 (57)       | 77 (60)         | 0.594   |
| Multiple ER visits (three or more)             | 107 (22)              | 71 (20)        | 36 (28)         | 0.058+  |
| Ambulance (yes/no)                             | 195 (40)              | 147 (41)       | 48 (36)         | 0.381   |
| Police detention (yes/no)                      | 80 (19)               | 61 (19)        | 19 (17)         | 0.610   |
| Arrested (yes/no)                              | 172 (36)              | 124 (35)       | 48 (38)         | 0.603   |
| Multiple arrests (two or more)                 | 75 (16)               | 48 (14)        | 27 (21)         | 0.044+  |
| Court appearance                               | 172 (35)              | 127 (36)       | 45 (35)         | 0.932   |
| Justice program                                | 48 (11)               | 30 (9)         | 18 (16)         | 0.076+  |

<sup>1</sup> Each multivariable model was controlled for age (continuous), age of first homelessness (continuous), gender, ethnicity (Aboriginals, Caucasian, Other), marital status (Single vs. Other) and language spoken in childhood home (English vs. Other).

\*\*p<0.001

\*p<0.05

+ p<0.10

## Learning problems and disabilities

Table 4: Logistic regression analyses for socio-demographics, mental disorders, substance use and service utilization related outcomes based on early learning problems or disability (n=497).

| Outcome Variable                                          | Unadjusted OR<br>(95% CI) | Adjusted OR<br>(95% CI) <sup>1</sup> |
|-----------------------------------------------------------|---------------------------|--------------------------------------|
| Age of first homelessness (<25 years) <sup>2</sup>        | 1.96 (1.30, 2.95)**       | 1.52 (0.95, 2.44)                    |
| Lifetime duration of homelessness (>3 years) <sup>#</sup> | 2.11 (1.40, 3.18)**       | 1.90 (1.19, 3.06)*                   |
| Education level (Grade 8 or less)                         | 2.38 (1.43, 3.95)         | 2.20 (1.28, 3.81)                    |
| <i>Type of Mental Disorder</i>                            |                           |                                      |
| Major Depressive Episode                                  | 1.64 (1.10, 2.45)*        | 1.64 (1.07, 2.52)*                   |
| Manic or Hypomanic Episode                                | 1.55 (0.96, 2.49)         | 1.51 (0.91, 2.51)                    |
| Panic Disorder                                            | 2.02 (1.28, 3.19)*        | 1.86 (1.15, 3.02)*                   |
| Alcohol dependence                                        | 1.67 (1.07, 2.59)*        | 1.69 (1.06, 2.69)*                   |
| Two or more mental disorders                              | 2.10 (1.40, 3.15)**       | 2.06 (1.33, 3.19)**                  |
| High suicidality                                          | 1.89 (1.16, 3.09)*        | 1.93 (1.15, 3.24)*                   |
| Less severe cluster of mental disorders                   | 2.10 (1.38, 3.16)**       | 1.95 (1.25, 3.04)*                   |
| <i>Physical Health</i>                                    |                           |                                      |
| Blood-borne infectious diseases                           | 1.76 (1.16, 2.66)*        | 1.75 (1.11, 2.74)*                   |
| Migraine                                                  | 2.57 (1.70, 3.90)**       | 2.50 (1.62, 3.88)**                  |
| Seizures                                                  | 2.11 (1.23, 3.61)*        | 2.23 (1.25, 4.00)*                   |
| Multiple physical illness                                 | 1.71 (0.98, 2.99)         | 2.16 (1.16, 4.02)*                   |
| Overall health (fair/poor)                                | 1.57 (1.06, 2.35)*        | 1.90 (1.24, 2.92)*                   |
| History of head injury                                    | 2.33 (1.51, 3.59)*        | 2.23 (1.42, 3.50)*                   |
| <i>Substance Use</i>                                      |                           |                                      |
| IV drug use                                               | 2.07 (1.28, 3.36)*        | 2.01 (1.19, 3.39)*                   |
| Daily drug use (no alcohol)                               | 2.07 (1.34, 3.19)**       | 1.77 (1.12, 2.80)*                   |
| Daily drug use (no alcohol, no marijuana)                 | 1.98 (1.18, 3.31)*        | 1.79 (1.03, 3.11)*                   |
| Daily substance use (including alcohol)                   | 1.93 (1.26, 2.94)*        | 1.70 (1.09, 2.65)*                   |
| Poly-substance use (no alcohol)                           | 1.50 (1.00, 2.24)         | 1.27 (0.82, 1.97)                    |
| Age first drunk (<14 years)                               | 1.75 (1.16, 2.65)*        | 1.37 (0.88, 2.14)                    |
| Age of first drug use (<14 years)                         | 1.98 (1.30, 3.02)**       | 1.60 (1.02, 2.50)*                   |
|                                                           | 2.53 (1.46, 4.36)**       | 2.31 (1.30, 4.11)*                   |
| <i>Service Use</i>                                        |                           |                                      |
| Talked with a health/social service provider              | 1.99 (1.30, 3.11)*        | 2.00 (1.25, 3.21)*                   |
| Multiple ER visits (three or more) <sup>#</sup>           | 1.12 (0.74, 1.68)         | 1.04 (0.67, 1.60)                    |
| Multiple arrests (two or more) <sup>#</sup>               | 1.70 (1.01, 2.87)*        | 1.65 (0.95, 2.86)                    |
| Justice program                                           | 1.76 (0.94, 3.92)         | 1.34 (0.59, 3.08)                    |

<sup>1</sup> Each multivariable model was controlled for age (continuous), age of first homelessness (continuous), gender, ethnicity (Aboriginal, Caucasian, Other), marital status (Single, Other) and language spoken in the childhood home (English, Other).

## Learning problems and disabilities

<sup>2</sup> This multivariable model was controlled for age (continuous), gender, ethnicity (Aboriginal, Caucasian, Other), marital status (Single, Other), and language spoken in the childhood home (English, Other).

# Dichotomized based on median value.

\*\*p≤0.001

\*p≤0.05

For peer review only

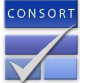

# CONSORT 2010 checklist of information to include when reporting a randomised trial\*

| Section/Topic                    | Item No | Checklist item                                                                                                                                                                                                  | Reported on page No |
|----------------------------------|---------|-----------------------------------------------------------------------------------------------------------------------------------------------------------------------------------------------------------------|---------------------|
| <b>Title and abstract</b>        |         |                                                                                                                                                                                                                 |                     |
|                                  | 1a      | Identification as a randomised trial in the title <b>(our findings focus on baseline data prior to the RCT elements. The RCT protocol and CONSORT details have been reported in a previous BMJ publication)</b> | N/A                 |
|                                  | 1b      | Structured summary of trial design, methods, results, and conclusions (for specific guidance see CONSORT for abstracts)                                                                                         | 2-3                 |
| <b>Introduction</b>              |         |                                                                                                                                                                                                                 |                     |
| Background and objectives        | 2a      | Scientific background and explanation of rationale                                                                                                                                                              | 5-6                 |
|                                  | 2b      | Specific objectives or hypotheses                                                                                                                                                                               | 7                   |
| <b>Methods</b>                   |         |                                                                                                                                                                                                                 |                     |
| Trial design                     | 3a      | Description of trial design (such as parallel, factorial) including allocation ratio                                                                                                                            | NA (see 1a)         |
|                                  | 3b      | Important changes to methods after trial commencement (such as eligibility criteria), with reasons                                                                                                              | NA (see 1a)         |
| Participants                     | 4a      | Eligibility criteria for participants                                                                                                                                                                           | 7-8                 |
|                                  | 4b      | Settings and locations where the data were collected                                                                                                                                                            | 7-8                 |
| Interventions                    | 5       | The interventions for each group with sufficient details to allow replication, including how and when they were actually administered                                                                           | NA (see 1a)         |
| Outcomes                         | 6a      | Completely defined pre-specified primary and secondary outcome measures, including how and when they were assessed                                                                                              | 9-10                |
|                                  | 6b      | Any changes to trial outcomes after the trial commenced, with reasons                                                                                                                                           | NA                  |
| Sample size                      | 7a      | How sample size was determined                                                                                                                                                                                  | 7                   |
|                                  | 7b      | When applicable, explanation of any interim analyses and stopping guidelines                                                                                                                                    | NA                  |
| <b>Randomisation:</b>            |         |                                                                                                                                                                                                                 |                     |
| Sequence generation              | 8a      | Method used to generate the random allocation sequence                                                                                                                                                          | NA (see 1a)         |
|                                  | 8b      | Type of randomisation; details of any restriction (such as blocking and block size)                                                                                                                             | NA (see 1a)         |
| Allocation concealment mechanism | 9       | Mechanism used to implement the random allocation sequence (such as sequentially numbered containers), describing any steps taken to conceal the sequence until interventions were assigned                     | NA (see 1a)         |
| Implementation                   | 10      | Who generated the random allocation sequence, who enrolled participants, and who assigned participants to interventions                                                                                         | NA (see 1a)         |

|    |                                                                                                                                                                                           |     |                                                                                                                                                   |                |
|----|-------------------------------------------------------------------------------------------------------------------------------------------------------------------------------------------|-----|---------------------------------------------------------------------------------------------------------------------------------------------------|----------------|
| 1  |                                                                                                                                                                                           |     |                                                                                                                                                   |                |
| 2  | Blinding                                                                                                                                                                                  | 11a | If done, who was blinded after assignment to interventions (for example, participants, care providers, those assessing outcomes) and how          | NA             |
| 3  |                                                                                                                                                                                           |     |                                                                                                                                                   |                |
| 4  |                                                                                                                                                                                           | 11b | If relevant, description of the similarity of interventions                                                                                       | NA             |
| 5  | Statistical methods                                                                                                                                                                       | 12a | Statistical methods used to compare groups for primary and secondary outcomes                                                                     | 10-11          |
| 6  |                                                                                                                                                                                           | 12b | Methods for additional analyses, such as subgroup analyses and adjusted analyses                                                                  | NA             |
| 7  |                                                                                                                                                                                           |     |                                                                                                                                                   |                |
| 8  |                                                                                                                                                                                           |     |                                                                                                                                                   |                |
| 9  | <b>Results</b>                                                                                                                                                                            |     |                                                                                                                                                   |                |
| 10 | Participant flow (a                                                                                                                                                                       | 13a | For each group, the numbers of participants who were randomly assigned, received intended treatment, and                                          | NA (see 1a)    |
| 11 | diagram is strongly                                                                                                                                                                       |     | were analysed for the primary outcome                                                                                                             |                |
| 12 | recommended)                                                                                                                                                                              | 13b | For each group, losses and exclusions after randomisation, together with reasons                                                                  | NA (see 1a)    |
| 13 | Recruitment                                                                                                                                                                               | 14a | Dates defining the periods of recruitment (and follow-up)                                                                                         | 9              |
| 14 |                                                                                                                                                                                           | 14b | Why the trial ended or was stopped                                                                                                                | NA             |
| 15 | Baseline data                                                                                                                                                                             | 15  | A table showing baseline demographic and clinical characteristics for each group                                                                  | Table 1 (p.23) |
| 16 | Numbers analysed                                                                                                                                                                          | 16  | For each group, number of participants (denominator) included in each analysis and whether the analysis was by original assigned groups           | NA             |
| 17 |                                                                                                                                                                                           |     |                                                                                                                                                   |                |
| 18 | Outcomes and                                                                                                                                                                              | 17a | For each primary and secondary outcome, results for each group, and the estimated effect size and its precision (such as 95% confidence interval) | Tables 2-4     |
| 19 | estimation                                                                                                                                                                                |     |                                                                                                                                                   | (pp.24-26)     |
| 20 |                                                                                                                                                                                           | 17b | For binary outcomes, presentation of both absolute and relative effect sizes is recommended                                                       |                |
| 21 | Ancillary analyses                                                                                                                                                                        | 18  | Results of any other analyses performed, including subgroup analyses and adjusted analyses, distinguishing pre-specified from exploratory         |                |
| 22 |                                                                                                                                                                                           |     |                                                                                                                                                   |                |
| 23 | Harms                                                                                                                                                                                     | 19  | All important harms or unintended effects in each group (for specific guidance see CONSORT for harms)                                             | NA             |
| 24 |                                                                                                                                                                                           |     |                                                                                                                                                   |                |
| 25 | <b>Discussion</b>                                                                                                                                                                         |     |                                                                                                                                                   |                |
| 26 | Limitations                                                                                                                                                                               | 20  | Trial limitations, addressing sources of potential bias, imprecision, and, if relevant, multiplicity of analyses                                  | 16             |
| 27 | Generalisability                                                                                                                                                                          | 21  | Generalisability (external validity, applicability) of the trial findings                                                                         | NA             |
| 28 | Interpretation                                                                                                                                                                            | 22  | Interpretation consistent with results, balancing benefits and harms, and considering other relevant evidence                                     | 12-15          |
| 29 |                                                                                                                                                                                           |     |                                                                                                                                                   |                |
| 30 | <b>Other information</b>                                                                                                                                                                  |     |                                                                                                                                                   |                |
| 31 | Registration                                                                                                                                                                              | 23  | Registration number and name of trial registry                                                                                                    | 3              |
| 32 | Protocol                                                                                                                                                                                  | 24  | Where the full trial protocol can be accessed, if available                                                                                       | 7              |
| 33 | Funding                                                                                                                                                                                   | 25  | Sources of funding and other support (such as supply of drugs), role of funders                                                                   | 18             |
| 34 |                                                                                                                                                                                           |     |                                                                                                                                                   |                |
| 35 |                                                                                                                                                                                           |     |                                                                                                                                                   |                |
| 36 |                                                                                                                                                                                           |     |                                                                                                                                                   |                |
| 37 |                                                                                                                                                                                           |     |                                                                                                                                                   |                |
| 38 |                                                                                                                                                                                           |     |                                                                                                                                                   |                |
| 39 | *We strongly recommend reading this statement in conjunction with the CONSORT 2010 Explanation and Elaboration for important clarifications on all the items. If relevant, we also        |     |                                                                                                                                                   |                |
| 40 | recommend reading CONSORT extensions for cluster randomised trials, non-inferiority and equivalence trials, non-pharmacological treatments, herbal interventions, and pragmatic trials.   |     |                                                                                                                                                   |                |
| 41 | Additional extensions are forthcoming: for those and for up to date references relevant to this checklist, see <a href="http://www.consort-statement.org">www.consort-statement.org</a> . |     |                                                                                                                                                   |                |
| 42 |                                                                                                                                                                                           |     |                                                                                                                                                   |                |
| 43 |                                                                                                                                                                                           |     |                                                                                                                                                   |                |
| 44 | CONSORT 2010 checklist                                                                                                                                                                    |     |                                                                                                                                                   |                |
| 45 |                                                                                                                                                                                           |     |                                                                                                                                                   |                |
| 46 | For peer review only - <a href="http://bmjopen.bmj.com/site/about/guidelines.xhtml">http://bmjopen.bmj.com/site/about/guidelines.xhtml</a>                                                |     |                                                                                                                                                   |                |
| 47 |                                                                                                                                                                                           |     |                                                                                                                                                   |                |
| 48 |                                                                                                                                                                                           |     |                                                                                                                                                   |                |
| 49 |                                                                                                                                                                                           |     |                                                                                                                                                   |                |

1  
2  
3  
4  
5  
6 Learning problems and disabilities  
7

8 **MANUSCRIPT COVER PAGE**  
9

10  
11 **TITLE. Missed Opportunities: Childhood Learning Disabilities as Early Indicators**  
12  
13 **of Risk among Homeless Adults with Mental Illness in Vancouver, British Columbia.**  
14

15 **AUTHORS:**

16 Michelle L. Patterson, PhD (corresponding author)  
17 Adjunct Professor  
18 Simon Fraser University  
19 Faculty of Health Sciences  
20 8888 University Drive, Blusson Hall Rm. 11010  
21 Burnaby, British Columbia  
22 V5A 1S6 Canada  
23 [michelle\\_patterson@sfu.ca](mailto:michelle_patterson@sfu.ca)  
24 Tel.: 778-782-5279

25  
26 Akm Moniruzzaman, PhD  
27 Research Associate  
28 Simon Fraser University

29  
30 ~~Julian M. Somers, PhD~~  
31 ~~Associate Professor~~  
32 ~~Simon Fraser University~~

33 Charles J. Frankish, PhD  
34 Professor  
35 University of British Columbia  
36 School of Population and Public Health

37  
38 ~~Julian M. Somers, PhD~~  
39 ~~Associate Professor~~  
40 ~~Simon Fraser University~~

41 **Key words:** homelessness, mental illness, learning disabilities  
42  
43  
44  
45  
46  
47  
48  
49  
50  
51  
52  
53  
54  
55  
56  
57  
58  
59  
60

1  
2  
3  
4  
5  
6 Learning problems and disabilities  
7  
8

9  
10 **ABSTRACT**

11 **Objectives.** It is well documented that early learning problems and poor academic  
12 achievement adversely impact child development and a wide range of adult outcomes;  
13 however, these indicators have received scant attention among homeless adults. This  
14 study examines self-reported learning disabilities in childhood as predictors of duration  
15 of homelessness, mental and substance use disorders, physical health, and service  
16 utilization in a sample of homeless adults with current mental illness.  
17  
18

19 **Design:** This study was conducted using the baseline sample from a randomized  
20 controlled trial.  
21  
22

23 **Setting:** Participants were sampled from the community in Vancouver, British Columbia.  
24  
25

26 **Participants:** The total sample included 497 adult participants who met criteria for  
27 absolute homelessness or precarious housing and a current mental disorder based on a  
28 structured diagnostic interview. Learning disabilities in childhood were assessed by  
29 asking adult participants whether they thought they had a learning disability in childhood  
30 and if anyone had told them they had a learning disability. Only participants who  
31 responded positively to both questions (n=133) were included in the analyses.  
32  
33

34 **Outcome measures.** Primary outcomes include current mental disorders, substance use  
35 disorders, physical health, service utilization and duration of homelessness.  
36  
37

38 **Results.** In multivariable regression models, self-reported learning disability during  
39 childhood independently predicted self-reported educational attainment and lifetime  
40 duration of homelessness as well as a range of mental health, physical health, and  
41 substance use problems, but did not predict reported health or justice service utilization.  
42  
43

44 **Conclusions.** Childhood learning problems are overrepresented among homeless adults  
45  
46  
47  
48  
49  
50  
51  
52

1  
2  
3  
4  
5  
6 Learning problems and disabilities  
7

8 with complex comorbidities and long histories of homelessness. Our findings are  
9 consistent with a growing body of literature indicating that adverse childhood events are  
10 potent risk factors for a number of adult health and psychiatric problems, including  
11 substance abuse. Results are discussed in the context of cumulative adversity and  
12 problem behaviour theory.  
13  
14  
15  
16  
17

18 **Trials registration number:** This trial has been registered with the International  
19 Standard Randomised Control Trial Number Register and assigned ISRCTN42520374.  
20  
21  
22  
23  
24  
25  
26  
27  
28  
29  
30  
31  
32  
33  
34  
35  
36  
37  
38  
39  
40  
41  
42  
43  
44  
45  
46  
47  
48  
49  
50  
51  
52  
53  
54  
55  
56  
57  
58  
59  
60



1  
2  
3  
4  
5  
6 Learning problems and disabilities  
7

## 8 **ARTICLE SUMMARY** 9

### 10 **Article focus**

- 11 • The relationship between self-reported learning disability in childhood as a  
12 predictor of adult homelessness and associated health and service use outcomes  
13 among a cohort of adult who are homeless and have a mental disorder.  
14
- 15 • Primary outcomes include current mental disorders, substance use disorders,  
16 physical health, service utilization and duration of homelessness.  
17
- 18 • How homelessness and the myriad of associated negative health and social  
19 outcomes might be prevented.  
20  
21  
22  
23  
24

### 25 **Key messages**

- 26 • Childhood learning disabilities are overrepresented among homeless adults with  
27 complex comorbidities and predict a range of poor health outcomes in adulthood  
28 including mood and anxiety disorders, suicidal ideation, early and severe  
29 substance use, and physical health problems.  
30  
31
- 32 • Early risk factors are often longstanding and drive a trajectory of cumulative risk,  
33 potentially leading to severe psychopathology and social exclusion.  
34  
35  
36  
37  
38

### 39 **Strengths and limitations of this study**

- 40 • Strengths include a large sample size, a diverse recruitment strategy, and  
41 structured diagnostic interviews for mental disorders.  
42
- 43 • Limitations include retrospective self-report of childhood learning disabilities.  
44
- 45 • Lack of access to early trauma and family dysfunction variables as well as  
46 measures of general cognitive impairment at baseline.  
47  
48  
49  
50  
51  
52  
53  
54  
55  
56  
57  
58  
59  
60

1  
2  
3  
4  
5  
6 Learning problems and disabilities  
7  
8  
9

## 10 INTRODUCTION

11 Efforts to prevent homelessness require an understanding of the underlying causes and  
12 early indicators of risk. Research into the causes of homelessness suggests complex  
13 interactions between structural and individual factors, both of which are often present  
14 long before the onset of first homelessness.[1-2] The childhoods of homeless adults are  
15 disproportionately characterized by persistent poverty, residential mobility, school  
16 problems, and other stressful and/or traumatic experiences[3-5] particularly among  
17 homeless individuals with severe mental illness.[2]  
18  
19  
20  
21  
22  
23  
24

25 While a growing body of research has examined the relationship between adverse  
26 childhood events and subsequent homelessness,[3, 4] few studies have examined the role  
27 of childhood learning disabilities. There is growing evidence that academic problems in  
28 school foreshadow later educational and employment difficulties and may affect multiple  
29 domains of functioning.[6]  
30  
31  
32  
33  
34

35 In Canada, educational policies fall under provincial jurisdiction, therefore,  
36 definitions of learning disabilities (LD) vary widely and include learning problems,  
37 difficulties, disorders, as well as “children at risk.”[7] LD are assumed to be neurological  
38 in origin and affect the acquisition, organization, retention, understanding or use of verbal  
39 and/or nonverbal information.[8] According to Statistics Canada, 4.9% of children aged  
40 6 to 15 have a LD, varying from 1.6% for children aged 6 to 7.2% among 10-year-  
41 olds.[9]  
42  
43  
44  
45  
46  
47  
48

49 While the consequences of LD on childhood academic and social development are  
50 well documented,[10, 11] the impact in adulthood is challenging to assess. However,  
51  
52  
53  
54  
55  
56  
57  
58  
59  
60

1  
2  
3  
4  
5  
6 Learning problems and disabilities

7  
8 research suggests that LD often persist into adulthood and affect diverse aspects of  
9  
10 functioning including employment, social relationships, quality of life, and mental and  
11  
12 physical health.[12]

13  
14 In school settings, LD typically manifest as poor academic achievement, which is  
15  
16 associated with a greater number of school absences, suspensions, and grade retention as  
17  
18 well as externalizing and internalizing behaviour problems.[7-10] Almost one-third of  
19  
20 US adolescents with LD in the National Longitudinal Transition Study did not complete  
21  
22 high school and were less likely to enroll in subsequent vocational or academic programs  
23  
24 compared to their non-LD peers.[10]

25  
26 Research examining substance abuse among youth with LD remains  
27  
28 inconclusive.[13] Beitchman et al.[11] assessed 264 Canadian children for LD at ages 12  
29  
30 and 19, and for psychiatric and substance use disorders at age 19. Children who met  
31  
32 criteria for LD at ages 12 and 19 were more likely to develop a psychiatric or substance  
33  
34 use disorder compared to non-LD children at both time points. LD at 19 years of age  
35  
36 increased the risk for substance use disorder three-fold after controlling for behavioural  
37  
38 problems and family structure. Difficulties with executive functioning, academic failure,  
39  
40 low self-esteem, and poor social skills are viewed as the strongest predictors of substance  
41  
42 use disorder.[14]

43  
44 Compared to non-LD peers, youth with LD frequently report feelings of loneliness,  
45  
46 stress, depression, and suicide, among other psychiatric symptoms.[15, 16] For example,  
47  
48 in the National Longitudinal Study of Adolescent Health, the LD sample was twice as  
49  
50 likely to report a suicide attempt in the past year.[16] Longitudinal research on risk-  
51  
52 taking indicates that, compared to non-LD peers, adolescents with LD engage more  
53  
54

1  
2  
3  
4  
5  
6 Learning problems and disabilities

7  
8 frequently in various risk behaviours.[17] Therefore, the presence of LD in childhood  
9  
10 appears to confer a general risk for adverse outcomes throughout adolescence and into  
11  
12 adulthood.

13  
14 In identifying early indicators for homelessness, we are posing a larger question  
15  
16 about how we might prevent homelessness and the myriad of associated negative health  
17  
18 and social outcomes. There has been a resurgence of interest in early intervention as a  
19  
20 means of preventing or attenuating a wide range of developmental outcomes in  
21  
22 adulthood.[18] In this study, we focus on the relationship between early LD as a  
23  
24 predictor of adult homelessness and associated health and service use outcomes. Unlike  
25  
26 family instability and dysfunction, which fall under the jurisdiction of child welfare  
27  
28 agencies, LD can be identified and addressed within the school system and may serve as  
29  
30 an early marker of social and developmental risk.

### 31 **METHODS**

32  
33 The Vancouver At Home Project is a randomized controlled trial (RCT) involving  
34  
35 homeless adults with mental illness in Vancouver, British Columbia. Study design and  
36  
37 sample size were determined by the At Home/Chez Soi National Research Team which  
38  
39 monitored activities at five different study sites.[19] Details related to the RCT protocol  
40  
41 such as CONSORT have been reported elsewhere[19]. The current study focuses on  
42  
43 baseline data from one study site (Vancouver) prior to randomization and does not  
44  
45 incorporate any findings related to RCT elements.

46  
47 Eligibility criteria included legal adult status (19 years and older), current mental  
48  
49 disorder on the MINI Neuropsychiatric Interview (MINI),[20] and being absolutely  
50  
51 homeless or precariously housed. Absolute homelessness was defined as living on the  
52  
53  
54  
55  
56  
57  
58  
59  
60

1  
2  
3  
4  
5  
6 Learning problems and disabilities

7  
8 streets or in an emergency shelter for at least the past seven nights with little likelihood of  
9  
10 obtaining secure accommodation in the upcoming month. Precariously housed was  
11  
12 defined as living in a rooming house, hotel or other transitional housing; in addition,  
13  
14 individuals must have experienced at least two episodes of absolute homelessness in the  
15  
16 past year, or one episode lasting for at least four weeks in the past year.

17  
18 Participants were recruited through referral from over 40 agencies available to  
19  
20 homeless adults in Vancouver; the majority were recruited from homeless shelters, drop-  
21  
22 in centres, homeless outreach teams, hospitals, community mental health teams, and  
23  
24 criminal justice programs. We specifically targeted organizations that serve women,  
25  
26 youth, aboriginal peoples, and gay/lesbian/transgender individuals in order to obtain as  
27  
28 diverse and representative a sample as possible. Referral was initiated by service  
29  
30 providers and a preliminary screening for eligibility was conducted via telephone with the  
31  
32 referral agent. All participants met face-to-face with a trained research interviewer who  
33  
34 explained procedures, obtained informed consent, and confirmed study eligibility. A  
35  
36 cash honorarium of \$5 was provided for the screening process. Institutional ethics board  
37  
38 approval was obtained through Simon Fraser University and the University of British  
39  
40 Columbia.

41  
42 Approximately 85 individuals were turned away on the phone because they  
43  
44 clearly did not meet eligibility criteria. In addition, approximately 100 individuals were  
45  
46 invited to meet with an interviewer for further eligibility screening and/or to begin the  
47  
48 baseline questionnaire but did not show up for an appointment. Whenever possible,  
49  
50 appointments were rescheduled and interviewers tried to locate individuals in the  
51  
52 community. Finally, 92 recruits completed the formal eligibility screening process but  
53  
54

1  
2  
3  
4  
5  
6 Learning problems and disabilities

7  
8 were deemed ineligible. When these individuals were compared with participants who  
9  
10 were enrolled in the study, no significant differences were found in terms of current age  
11  
12 or gender.  
13

14  
15 If the individual met all study criteria, they were enrolled as a participant and the  
16  
17 baseline interview commenced, consisting of a series of interviewer-administered  
18  
19 questionnaires including socio-demographic characteristics, psychiatric symptoms,  
20  
21 substance use, physical health, service use, and quality of life. Participants received a  
22  
23 further cash honorarium of \$30 upon completion of the baseline interview. The  
24  
25 following analyses are based upon data from the baseline questionnaires of 497  
26  
27 participants recruited from October 2009 to June 2011.  
28

### 29 **Variables of interest**

30  
31  
32 LD were assessed using the following questions, focusing on childhood: (1) “Do  
33  
34 you think you had a learning problem or learning disability?” and (2) “Did anyone ever  
35  
36 tell you that you have a learning problem or learning disability?” ~~Only Given the~~  
37  
38 retrospective nature of these questions, only participants who responded positively to  
39  
40 both questions were included in the analysis.  
41

42 With regard to mental disorders, Severe Cluster includes at least one of current  
43  
44 Psychosis, Mood Disorder with Psychotic Features, and Hypomanic or Manic Episode, as  
45  
46 identified through the MINI or documented physician diagnosis. Less Severe Cluster  
47  
48 includes at least one of current Major Depressive Episode, Panic Disorder, and Post-  
49  
50 traumatic Stress Disorder. Suicidality, Alcohol Dependence, and Substance Dependence  
51  
52 were also identified using the MINI. Frequency and type of substance use over the past  
53  
54

1  
2  
3  
4  
5  
6 Learning problems and disabilities

7  
8 month were recorded using the Maudsley Addiction Profile (MAP).[21] Physical illness  
9  
10 was assessed by self-report using a checklist of 30 chronic health conditions (lasting  
11  
12 longer than six months). Blood-borne infectious disease consisted of positive self-report  
13  
14 diagnosis of HIV, Hepatitis B or Hepatitis C. Head injury status was based on the  
15  
16 question “Did you ever receive a head injury that left you unconscious?” Shoplifting and  
17  
18 selling drugs were assessed during the past month using the MAP.  
19

20  
21 Self-reported involvement with health services was collected for the past six  
22  
23 months including visiting and talking to a health or service provider, Emergency Room  
24  
25 visits, and being transported by ambulance. Criminal justice services included contact  
26  
27 with the police that resulted in detention, arrest and court appearances. The Multnomah  
28  
29 Community Ability Scale (MCAS)[22] quantifies community functioning based on 17  
30  
31 items and was scored by the interviewer upon completion of the baseline interview.

### 32 **Statistical analyses**

33  
34 Comparisons of categorical data between participants who did or did not report a  
35  
36 learning problem or disability were conducted using Pearson’s chi-square or Fisher’s  
37  
38 exact test. Comparisons of numeric variables (e.g., age at enrolment) between groups  
39  
40 were conducted using the Student t test and Wilcoxon’s rank-sum test. Univariate and  
41  
42 multivariable logistic regression analyses were used to model the independent  
43  
44 associations between childhood LD and a series of a priori outcome variables. Outcomes  
45  
46 variables that were significant at the  $p \leq 0.10$  level were considered for univariate and  
47  
48 multivariable logistic regression analyses. Each variable was modeled in both univariate  
49  
50 and multivariate settings using childhood LD as an independent risk factor and the same  
51  
52 set of controlling variables (age at enrolment, age of first homelessness, gender, ethnicity,  
53  
54

1  
2  
3  
4  
5  
6 Learning problems and disabilities

7  
8 marital status, and language spoken in the childhood home). Both unadjusted and  
9  
10 adjusted odds ratios and 95% confidence intervals (CI) are reported and all p-values are  
11  
12 two-sided. SPSS-19 was used to conduct these analyses. Missing values ranged from  
13  
14 zero to 4% and were excluded from the analyses.

## 15 16 17 RESULTS

18  
19 In total, 497 participants completed the baseline questionnaire; 178 participants (36%)  
20  
21 thought they had a learning problem or disability in childhood, 182 (37%) reported being  
22  
23 told they had a learning problem or disability, and 133 (27%) responded positively to  
24  
25 both indicators of childhood LD. The majority of the total sample was male (73%) and  
26  
27 Caucasian (56%); the mean age at enrollment was 40.8 (SD=11.0) years; and the mean  
28  
29 age when first homeless was 30.3 (SD=13.3) years. The median duration of lifetime  
30  
31 homelessness was 36 months (IQR: 12-84 months). All bivariate comparisons by  
32  
33 childhood LD are summarized in Tables 1 to 3. Tables 1 and 2 present demographic  
34  
35 characteristics and current mental disorder status of participants by childhood LD status  
36  
37 (yes vs. no).

38 [Insert Tables 1 and 2 about here]

39  
40 Table 3 presents self-reported substance use (past month) and service use (past six  
41  
42 months) characteristics by childhood LD status. Participants who reported having a  
43  
44 childhood LD were significantly more likely to report a number of negative health  
45  
46 outcomes related to physical health (i.e., blood-borne infectious diseases, migraine, and  
47  
48 seizures), mental health (i.e., major depressive episode, panic disorder, high suicidality)  
49  
50 and substance use (i.e., alcohol dependence, early initiation of drug use, daily drug use,  
51  
52 and injection drug use).



1  
2  
3  
4  
5  
6 Learning problems and disabilities  
7

8 [Insert Table 3 about here]  
9

10 Unadjusted (UOR) and adjusted odds ratios (AOR) and 95% CI for variables  
11 included in the univariate and multivariable analyses are presented in Table 4. Results  
12 from the multivariable logistic regression analyses indicate that reporting a childhood LD  
13 independently predicted not entering high school (AOR: 2.21), lifetime duration of  
14 homelessness greater than three years (AOR: 1.90), current major depressive episode  
15 (AOR: 1.64), panic disorder (AOR: 1.86), alcohol dependence (AOR: 1.69), high  
16 suicidality (AOR: 1.93), less severe cluster of mental disorders (AOR: 1.95), two or more  
17 mental disorders (AOR: 2.06), infectious disease (AOR: 1.75), migraine (AOR: 2.50),  
18 seizures (AOR: 2.23), head injury (AOR: 2.23), poor or fair overall health (AOR: 1.90),  
19 injection drug use (AOR: 2.01), daily drug and alcohol use (AOR: 1.70), daily drug use  
20 (not including alcohol) (AOR: 1.77), daily hard drug use (not including alcohol or  
21 marijuana) (AOR: 1.79), early initiation of drug use (<14 years) (AOR: 1.60), shoplifting  
22 in the past six months (AOR: 2.31), and talking to a health or social service provider in  
23 the past six months (AOR: 2.00).  
24  
25  
26  
27  
28  
29  
30  
31  
32  
33  
34  
35  
36

37 [Insert Table 4 about here]  
38

### 39 **DISCUSSION**

40 Our multivariable models identified several factors that were associated with self-  
41 reported childhood LD in a cohort of adults who are homeless and have a mental  
42 disorder: longer lifetime duration of homelessness; less severe mental disorders as well as  
43 multiple mental disorders and high suicidal ideation; early and severe substance use,  
44 including injection drug use and daily use of both drugs and alcohol; and physical health  
45 problems including infectious disease, head injury, multiple illnesses, and rating ones'  
46  
47  
48  
49  
50  
51  
52  
53  
54  
55  
56  
57  
58  
59  
60

1  
2  
3  
4  
5  
6 Learning problems and disabilities

7  
8 overall health as fair or poor. Despite the complex health needs of this sub-group, the  
9  
10 only service use variable that was predicted by childhood learning problems or  
11  
12 disabilities was very generic: talking to a health or social service provider in the past six  
13  
14 months. A range of criminal justice variables as well as emergency room, ambulance  
15  
16 utilization, and various other health services were not significant in our analyses.  
17  
18 Collectively, our results indicate that childhood LD are overrepresented among homeless  
19  
20 adults with complex comorbidities and predict a range of poor health outcomes in  
21  
22 adulthood.

23  
24 These findings support previous research demonstrating a link between poor  
25  
26 academic achievement and the psychological adversity faced by some adults.[6, 23]  
27  
28 Studies of homeless and highly mobile children have identified that both groups show  
29  
30 slower learning and academic progress than their residentially stable peers.[23] However,  
31  
32 the risk of homelessness among people with LD has received scant attention in the  
33  
34 research literature.[24, 25] Among our sample of homeless adults, 41% did not graduate  
35  
36 from high school and 43% reported being in a special class in school, suggesting that  
37  
38 learning and academic achievement was challenging throughout their school years and  
39  
40 likely persists in adulthood in the form of poor literacy skills and difficulties finding and  
41  
42 maintaining employment.

43  
44 Our index of LD does not discriminate between focal and more general cognitive  
45  
46 difficulties, nor did we assess the presence of LD in adulthood. Several studies have  
47  
48 found increased rates of general cognitive impairment among homeless adults compared  
49  
50 to housed comparison groups.[26, 27] In our sample of homeless adults with current  
51  
52 mental disorders, 66% reported experiencing a head injury that left them unconscious.  
53  
54

1  
2  
3  
4  
5  
6 Learning problems and disabilities  
7

8  
9 However, these injuries may have occurred in adulthood and it is well documented that  
10 homeless adults are more likely to experience a variety of accidents compared to housed  
11 counterparts.[27] It is also possible that childhood LD among our sample were related to  
12 psychological distress in the home.[24] Regardless of the origin of learning problems  
13 among homeless adults, it appears that they persist over time and are associated with  
14 significant functional impairment.  
15  
16  
17  
18  
19

20 Childhood LD independently predicted a range of substance use problems in our  
21 adult sample, including early initiation of drug use (before age 14). Abuse of alcohol and  
22 other drugs places an individual at greater risk of homelessness, but is not a direct causal  
23 factor.[28] Along with other studies, our findings suggest that daily drug use is a  
24 common mediator for a range of early risk factors.[29] Previous research using our  
25 sample of homeless adults with mental disorders found that daily drug use significantly  
26 predicts duration of homelessness[30] as well as severity of mental health symptoms.[31]  
27  
28  
29  
30  
31  
32

33 Cross-sectional, retrospective data cannot disentangle the unique predictors of  
34 homelessness and mental illness, but it is likely that negative childhood experiences have  
35 both direct and indirect (mediated by substance use) effects on participants' history of  
36 homelessness. Documentation of these underlying common factors points to a broad  
37 range of vulnerabilities for homelessness and mental illness. These common factors  
38 increase the complexity of personal problems as well as the duration of  
39 homelessness.[30] Therefore, substance dependence, especially when concurrent with  
40 mental illness among homeless populations, is not only a clinical problem but also a  
41 critical indicator for a range of other social and psychological problems that may need to  
42 be addressed before homelessness can be resolved.  
43  
44  
45  
46  
47  
48  
49  
50  
51  
52  
53  
54  
55  
56  
57  
58  
59  
60

1  
2  
3  
4  
5  
6 Learning problems and disabilities  
7

8 Problems such as homelessness that have long developmental trajectories, are  
9 perhaps best understood from models of cumulative adversity and amplification of  
10 risk.<sup>[32,33]</sup> Based on life course development and social learning theory, the risk  
11 amplification model addresses mechanisms through which experiences on the street  
12 amplify negative developmental effects originating in the family. According to this  
13 model, harmful behaviours and negative self-concept are perpetuated by the progressive  
14 accumulation of their own consequences. Thus, homelessness can be understood as the  
15 result of a developmental trajectory defined by successive environmental disruptions,  
16 each of which places individuals at greater risk for homelessness and associated risk  
17 factors.  
18

19 Individuals generally become homeless after experiencing a crisis due to limited  
20 income, social support, and personal coping skills.<sup>[5, 28]</sup> However, it is unclear what  
21 leads some people to become homeless while others do not. The risk amplification model  
22 may apply primarily to subgroups who are most vulnerable to a variety of structural  
23 contributors to homelessness such as poverty and the lack of affordable housing.  
24

25 Problem Behaviour Theory<sup>[33,34, 34,35]</sup> suggests that various risk factors may comprise a  
26 cluster of risky behaviours that mediate the link from childhood adversity to illicit drug  
27 use in adulthood, rather than distinct independent pathways. Another potential pathway  
28 linking childhood adversity to adult homelessness is the likelihood that such adversity  
29 elevates individuals' risk for psychiatric disorders such as depression and substance  
30 abuse, which are risk factors for homelessness, by reducing one's ability to earn adequate  
31 income and maintain stable housing.  
32

### 33 **Implications**

34  
35  
36  
37  
38  
39  
40  
41  
42  
43  
44  
45  
46  
47  
48  
49  
50

1  
2  
3  
4  
5  
6 Learning problems and disabilities

7  
8 The growing body of research that suggests a trajectory of risk preceding the first episode  
9  
10 of homelessness begs the question “Can outcomes such as homelessness be prevented?”

11  
12 In addition to addressing structural barriers such as income inequality and affordable

13  
14 housing. Many researchers and policy makers have called for comprehensive  
15  
16 preventive interventions for high-risk children in public and community settings.<sup>[3536,</sup>  
17  
18 <sup>3637]</sup> Supporting children’s cognitive development and schooling is particularly  
19  
20 important and early childhood education programs should be available for children at  
21  
22 greatest risk. High risk includes established indicators such as early learning problems,  
23  
24 abuse and/or neglect, behavioural and emotional problems, and early substance use.

25  
26 From a public health perspective, early interventions in childhood might change or  
27  
28 moderate the cycle of homelessness across generations because early risk factors are  
29  
30 often longstanding and drive a trajectory of cumulative risk, potentially leading to severe  
31  
32 psychopathology and social exclusion. Despite the need for early intervention, our study  
33  
34 also highlights the need for identifying and addressing current learning problems among  
35  
36 homeless adults. Learning problems may contribute to challenges with print and  
37  
38 financial literacy, obtaining and maintaining housing and employment, and a wide range  
39  
40 of daily living skills.

#### 41 **Limitations**

42  
43 Despite the strengths of our study design (i.e., large sample size, diverse recruitment  
44  
45 strategy, structured diagnostic interviews), several limitations must be considered. First,  
46  
47 all variables were based on participant self-report. Given that participants were selected  
48  
49 based on current mental disorder, accuracy of recall may have been compromised.  
50  
51 Furthermore, participants were interviewed before being randomized to a housing  
52  
53  
54

1  
2  
3  
4  
5  
6 Learning problems and disabilities

7  
8 intervention, therefore, some may have modified their responses in an attempt to  
9  
10 influence the outcome of randomization. In addition, at baseline, we did not have access  
11  
12 to early trauma or family dysfunction variables. Given the association between early  
13  
14 trauma, foster care placements and adult homelessness,[2] it will be important to further  
15  
16 examine the impact of these variables on later health and social outcomes. Similarly, we  
17  
18 did not have access to measures of current LD or general cognitive impairment at  
19  
20 baseline. Examination of current cognitive impairment, particularly as it relates to early  
21  
22 learning problems, may shed light on current health and social functioning.

### 23 24 **Future directions**

25  
26 Early indicators of risk clearly cannot explain all cases of homelessness. Many people  
27  
28 without early risk factors become homeless and many who experience risk do not become  
29  
30 homeless. Further research is needed to examine what differentially places people at risk  
31  
32 for risk.[3738] We need better theory and better data to understand how social factors  
33  
34 regulate behaviours or distribute individuals into risk groups and how those social factors  
35  
36 ‘push’ individual trajectories toward or away from adverse outcomes. However, our  
37  
38 results linking early learning problems to homelessness, mental illness and substance use  
39  
40 are consistent with a growing body of research indicating that adverse childhood events  
41  
42 are potent risk factors for a number of psychiatric and substance use disorders.[6]

43  
44 Real prevention with regard to homelessness and other social problems will  
45  
46 require systemic social and policy changes that address the environments within which  
47  
48 children adapt so that they can mature into well-functioning adults. Nonetheless, our  
49  
50 findings, along with others’, outline a risk profile that can guide future research into  
51  
52 mechanisms and pathways through which childhood risks are translated into adult

1  
2  
3  
4  
5  
6 Learning problems and disabilities

7  
8 sequelae. Interventions that can effectively address childhood risk factors such as  
9  
10 learning problems and disabilities may ultimately prevent critical social problems  
11  
12 including homelessness and the enormous social and individual costs related to these  
13  
14 problems.

#### 15 16 **ACKNOWLEDGEMENTS**

17  
18 The authors thank the At Home/Chez Soi Project collaborative at both national and local  
19  
20 levels; National project team: J. Barker, PhD (2008–2011) and C. Keller, National Project  
21  
22 Leads; P. Goering, RN, PhD, Research Lead; approximately 40 investigators from across  
23  
24 Canada and the US; 5 site coordinators; numerous service and housing providers; and  
25  
26 persons with lived experience.

#### 27 28 **DECLARATION OF INTERESTS**

29  
30 This research was funded by Health Canada and the Mental Health Commission of  
31  
32 Canada. The views expressed herein solely represent the authors.

#### 33 34 **REFERENCES**

- 35  
36 1 Shinn M. International homelessness: Policy, socio-cultural, and individual  
37  
38 perspectives. *J Soc Issues* 2007;**63**(3):657-677.
- 39  
40 2 Sullivan G, Burnam A, Koegel P. Pathways to homelessness among the mentall ill. *Soc*  
41  
42 *Psychiatry Epidemiol* 2000;**35**:444-450.
- 43  
44 3 Herman D, Susser ES, Struening EL, Link BL. Adverse childhood experiences: are  
45  
46 they risk factors for adult homelessness? *Am J Public Health* 1997;**87**(2):249-255.
- 47  
48 4 Koegel P, Malamid E, Burnam MA. Childhood risk factors for homelessness among  
49  
50 homeless adults. *Am J Public Health* 1995;**85**(12):1642-1649.

1  
2  
3  
4  
5  
6 Learning problems and disabilities

7  
8 5 Lehmann ER, Kass PH, Drake CM, Nichols SB. Risk factors for first-time  
9  
10 homelessness in low-income women. *Am J Orthopsychiatry* 2007;**77**(1):20-28.

11  
12 6 Masten A, Long JD, Roisman G, Burt K, Obradovic J, Roberts M, et al. Developmental  
13  
14 cascades: linking academic achievement, externalizing and internalizing symptoms over  
15  
16 20 years. *Dev Psychol* 2005;**41**:733-746.

17  
18 7 Wiener J, Siegel L. A Canadian perspective on learning disabilities. *J Learn Disabil*  
19  
20 1992;**25**(6):340-350.

21  
22 8 Ferrari M. A comparative assessment of the cognitive functioning of adults with  
23  
24 childhood histories of learning disability and adults with neurocognitive disorders. *J Dev*  
25  
26 *Phys Disabil* 2009;**21**:355-368.

27  
28 9 Statistics Canada. The daily release 2007. Available at  
29  
30 <http://www.statcan.ca/Daily/English/071203/d071203a.htm>. Retrieved on April 25, 2012.

31  
32 10 Blackorby J, Wagner M. Longitudinal postschool outcomes of youth with disabilities:  
33  
34 findings from the National Longitudinal Transition Study. *Except Child* 1996;**62**(5):399-  
35  
36 413.

37  
38 11 Beitchman JH, Wilson B, Douglas L, Young A, Adlaf E. Substance abuse disorders in  
39  
40 young adults with and without LD: predictive and concurrent relationships. *J Learn*  
41  
42 *Disabil* 2001;**34**(4):317-332.

43  
44 12 Gerber PJ. The impact of learning disabilities on adulthood: a review of the  
45  
46 evidenced-based literature for research and practice in adult education. *J Learn Disabil*  
47  
48 2012;**45**(1):31-46.



1  
2  
3  
4  
5  
6 Learning problems and disabilities  
7

8 13 Janusis GM, Weyandt LL. An exploratory study of substance use and misuse among  
9 college students with and without ADHD and other disabilities. *J Atten Disord* 2010;  
10 **14**(3):205-215.  
11

12 14 Weinberg NZ. Risk factors for adolescent substance abuse. *J Learn Disabil* 2001;  
13 **34**(4):343-351.  
14

15 15 Buysse V, Goldman B, Skinner ML. Seeing effects on friendship formation among  
16 young children with and without learning disabilities. *Except Child* 2003;**68**(4):503-517.  
17

18 16 Svetaz M, Ireland M, Blum R. Adolescents with learning disabilities: risk and  
19 protective factors associated with emotional well-being. *J Adol Health* 2000;**27**:340-348.  
20

21 17 McNamara JK, Willoughby T. A longitudinal study of risk-taking behavior in  
22 adolescents with learning disabilities. *Learn Disabil Res Prac* 2010;**25**(1):11-24.  
23

24 18 Ben-Shlomo Y, Kuh D. A life course approach to chronic disease epidemiology:  
25 conceptual models, empirical challenges and interdisciplinary perspectives. *Int J*  
26 *Epidemiol* 2002;**34**(2):285-293.  
27

28 19 Goering PN, Streiner DL, Adair C, Aubry T, Barker J, Distasio J,  
29 et al. The At Home/Chez Soi trial protocol: a pragmatic, multi-site, randomised  
30 controlled trial of a Housing First intervention for homeless individuals with mental  
31 illness in five Canadian cities. *BMJ Open* 2011;**1**(2):e000323.  
32

33 20 Sheehan DV, Lecrubier Y, Sheehan KH, Amorim P, Janavs J, Weiller E. et al. The  
34 Mini-International Neuropsychiatric Interview (M.I.N.I.): The development and  
35 validation of a structured diagnostic psychiatric interview for DSM-IV and ICD-10. *J*  
36 *Clin Psychiatry* 1998;**59**(Suppl 20):22-33.  
37  
38  
39  
40  
41  
42  
43  
44  
45  
46  
47  
48  
49  
50  
51  
52  
53  
54  
55  
56  
57  
58  
59  
60

1  
2  
3  
4  
5  
6 Learning problems and disabilities

7  
8 21 Marsden J, Gossop M, Stewart D, Best D, Farrell M, Strang, J. *The Maudsley*

9  
10 *Addiction Profile (MAP): A brief instrument for treatment outcome research.*

11  
12 *Development and User Manual.* London UK: National Addiction Centre/Institute of

13  
14 Psychiatry 1998. Available at:

15  
16 [http://www.iop.kcl.ac.uk/iopweb/blob/downloads/locator/1\\_346\\_MAP.pdf](http://www.iop.kcl.ac.uk/iopweb/blob/downloads/locator/1_346_MAP.pdf). Accessed

17  
18 April 25, 2012.

19  
20 22 Barker S., Barron N., McFarland B.H., et al. A community ability scale for chronically

21  
22 mentally ill consumer. *Community Ment Health J* 1994;**30**:459-472.

23  
24 23 Obradovic J, Long JD, Cutuli JJ, Chan C, Hinz E, Heistad D, Masten A. Academic

25  
26 achievement of homeless and highly mobile children in an urban school district:

27  
28 longitudinal evidence on risk, growth, and resilience. *Dev Psychopathol* 2009;**21**:493-

29  
30 518.

31  
32 24 Trueland J. People with learning disabilities hidden among the homeless. *Learn Dis*

33  
34 *Prac* 2009;**12**(2):18-20

35  
36 25 Spence S, Stevens R, Parks R. Cognitive dysfunction in homeless adults: a systematic

37  
38 review. *J R Soc Med* 2004;**97**:375-379.

39  
40 26 Bousman C, Twamley E, Vella L, Gale M, Norman S, Judd P, et al. Homelessness and

41  
42 neuropsychological impairment: preliminary analysis of adults entering outpatient

43  
44 psychiatric treatment. *J Nerv Ment Dis* 2010;**198**(11):790-794.

45  
46 27 Hwang SW, Colantonio A, Chiu S, Tolomiczenko G, Kiss A, Cowan L, et al. The

47  
48 effect of traumatic head injury on the health of homeless people. *Can Med Assoc J*

49  
50 2008;**179**(8):779-784.

Learning problems and disabilities

28 Sosin MR, Bruni M. Homelessness and vulnerability among adults with and without alcohol problems. *Subst Use Misuse* 1997;**32**(7-8):939-968.

29 Brook DW, Brook JS, Zhang C, Cohen P, Whiteman M. Drug use and the risk of major depressive disorder, alcohol dependence, and substance use disorder. *Arch Gen Psychiatry* 2002;**59**(11):1039-1044.

30 Patterson M, Somers JM, Moniruzzaman A. Prolonged and persistent homelessness: Multivariable analyses in a cohort experiencing current homelessness and mental illness in Vancouver, British Columbia. *Ment Health Subst Use* 2012;**5**(2):85-101.

31 Palepu A, Patterson M, Strehlau V, Moniruzzaman A, tan de Bibiana J, et al. Daily Substance Use and Mental Health Symptoms among a cohort of Homeless Adults in Vancouver, British Columbia. *J Urban Health*, under review in press.

32 Paradise M, Cause AM, Ginzler J, Wert S, Wruck K, Brooker M. The role of relationships in developmental trajectories of homeless and runaway youth. In: Sarason, BR, Duck S, eds. *Personal relationships: Implications for clinical and community psychology*. NY: John Wiley & Sons Ltd 2001:159-179.

33 Padgett D, Smith BT, Henwood B, Tiderington E. Life course adversity in the lives of formerly homeless persons with serious mental illness: context and meaning. *Am J Orthopsych* 2012;**82**:421-430.

33-34 Jessor R. Risk behavior in adolescence: a psychosocial framework for understanding and action. *J Adol Health* 1991;**12**:597-605.

34-35 Jessor R, Jessor SL. *Problem Behavior and Psychosocial Development: A Longitudinal Study of Youth*. NY: Academic Press 1977.

Formatted: Font: Italic

Formatted: Font: Bold

1  
2  
3  
4  
5  
6 Learning problems and disabilities  
7

8 [35-36](#) Lee SS, August GJ, Gewirtz A, Klimes-Dougan B, Bloomquist M, Realmuto G.  
9

10 Identifying unmet mental health needs in children of formerly homeless mothers living in  
11 a supportive housing community sector of care. *J Abnorm Child Psychol* 2010;**38**:421-  
12 432.  
13

14 [36-37](#) Shinn M, Schteingart JS, Williams NC, Carlin-Mathis J, Bialo-Karagis N, Becker-  
15 Klein R, et al. Long-term associations of homelessness with children's well-being. *Am*  
16 *Behav Sci* 2008;**51**(6):798-809.  
17

18 [37-38](#) Link B, Phelan J. Social conditions as fundamental causes of disease. *J Health Soc*  
19 *Beh* 1995;**35**:80-94.  
20  
21  
22  
23  
24  
25  
26  
27  
28  
29  
30  
31  
32  
33  
34  
35  
36  
37  
38  
39  
40  
41  
42  
43  
44  
45  
46  
47  
48  
49  
50  
51  
52  
53  
54  
55  
56  
57  
58  
59  
60

## Learning problems and disabilities

Table 1: Comparisons of socio-demographic characteristics between participants who reported childhood learning problems or disabilities (LD-Yes; n=133) and those who did not (LD-No; n=364).<sup>1</sup>

| Variable                                                        | Total Sample<br>N (%) | LD-No<br>N (%) | LD-Yes<br>N (%) | p value  |
|-----------------------------------------------------------------|-----------------------|----------------|-----------------|----------|
| Male gender                                                     | 359 (73)              | 259 (72)       | 100 (76)        | 0.375    |
| Age at enrolment                                                |                       |                |                 | 0.001**  |
| 19-25 years                                                     | 36 (7)                | 25 (7)         | 11 (8)          |          |
| 25-44 years                                                     | 281 (57)              | 190 (52)       | 91 (68)         |          |
| Over 44 years                                                   | 180 (36)              | 149 (41)       | 31 (23)         |          |
| Ethnicity                                                       |                       |                |                 | 0.469    |
| Aboriginal                                                      | 77 (15)               | 52 (14)        | 25 (19)         |          |
| Caucasian                                                       | 280 (56)              | 208 (57)       | 72 (54)         |          |
| Other                                                           | 140 (28)              | 104 (29)       | 36 (27)         |          |
| Educational attainment (≤Grade 8)                               | 76 (15)               | 44 (12)        | 32 (25)         | <0.001** |
| Single marital status                                           | 343 (70)              | 250 (69)       | 93 (70)         | 0.797    |
| Language spoken at home during childhood (English)              | 392 (79)              | 282 (77)       | 110 (83)        | 0.206    |
| Psychiatric hospitalization (past 5 years) longer than 6 months | 57 (12)               | 43 (12)        | 14 (11)         | 0.686    |
| Psychiatric hospitalization (past 5 years) 2 or more times      | 253 (53)              | 189 (54)       | 64 (50)         | 0.542    |
| Employment history (at least 1 year of continuous work)         | 323 (65)              | 243 (67)       | 80 (60)         | 0.138    |
| Jail (past 6 months)                                            | 68 (14)               | 46 (13)        | 22 (17)         | 0.262    |
| Duration of homelessness                                        |                       |                |                 | <0.001** |
| Total lifetime (>3 years)                                       | 234 (48)              | 155 (43)       | 79 (61)         |          |
| Longest single period (>1 year)                                 | 245 (50)              | 174 (48)       | 71 (55)         | 0.143    |
| Age of first homelessness (<25 years)                           | 214 (44)              | 143 (39)       | 71 (56)         | 0.001**  |
| Overall health (poor or fair)                                   | 235 (47)              | 161 (44)       | 74 (56)         | 0.026*   |
| MCAS total score (<56) #                                        | 244 (49)              | 177 (49)       | 67 (50)         | 0.730    |

<sup>1</sup> Each multivariable model was controlled for age (continuous measure), age of first homelessness age (continuous measure), gender, ethnicity (Aboriginals, Caucasian, Other), marital status (Single vs. Other) and language spoken in childhood home (English vs. Other).

# Dichotomized based on median value.

\*\*p≤0.001

\*p≤0.05

## Learning problems and disabilities

Table 2: Comparisons of mental disorders and physical illness between participants who reported childhood learning problems or disability (LD-Yes; n=133) and those who did not (LD-No; n=364).<sup>1</sup>

| Variable                              | Total sample<br>N (%) | LD-No<br>N (%) | LD-Yes<br>N (%) | p value  |
|---------------------------------------|-----------------------|----------------|-----------------|----------|
| <i>Mental Disorders (past month)</i>  |                       |                |                 |          |
| Major Depressive Episode              | 199 (40)              | 134 (37)       | 65 (49)         | 0.015*   |
| Manic or Hypomanic Episode            | 97 (20)               | 64 (18)        | 33 (25)         | 0.072+   |
| Post-traumatic Stress Disorder        | 129 (26)              | 88 (24)        | 41 (31)         | 0.122    |
| Panic Disorder                        | 104 (21)              | 64 (18)        | 40 (30)         | 0.002*   |
| Mood Disorder with Psychotic Features | 84 (17)               | 57 (16)        | 27 (20)         | 0.208    |
| Psychotic Disorder                    | 263 (53)              | 200 (55)       | 63 (47)         | 0.134    |
| Alcohol dependence                    | 121 (24)              | 79 (22)        | 42 (32)         | 0.023*   |
| Substance dependence                  | 288 (58)              | 205 (56)       | 83 (62)         | 0.224    |
| Two or more mental disorders          | 240 (48)              | 158 (43)       | 82 (62)         | <0.001** |
| High suicidality                      | 87 (18)               | 54 (15)        | 33 (25)         | 0.010+   |
| Less severe cluster                   | 264 (53)              | 176 (48)       | 88 (66)         | <0.001** |
| Severe cluster                        | 363 (73)              | 267 (73)       | 96 (72)         | 0.794    |
| <i>Physical Health</i>                |                       |                |                 |          |
| Migraine                              | 157 (32)              | 94 (26)        | 63 (48)         | <0.001** |
| Epilepsy or seizures                  | 67 (14)               | 40 (11)        | 27 (21)         | 0.006*   |
| Blood-borne infectious diseases       | 157 (32)              | 103 (29)       | 54 (41)         | 0.008*   |
| Head injury                           | 270 (56)              | 179 (51)       | 91 (71)         | <0.001** |
| Two or more physical conditions       | 402 (81)              | 287 (78.8)     | 115 (86)        | 0.056+   |

<sup>1</sup> Each multivariable model was controlled for age (continuous), age of first homelessness (continuous), gender, ethnicity (Aboriginals, Caucasian, Other), marital status (Single vs. Other) and language spoken in childhood home (English vs. Other).

\*\*p≤0.001

\*p≤0.05

+ p≤0.10

## Learning problems and disabilities

Table 3: Comparisons of substance use and service utilization between participants who reported childhood learning problems or disability (LD-Yes; n=133) and those who did not (LD-No; n=364).<sup>1</sup>

| Variable                                       | Total sample<br>N (%) | LD-No<br>N (%) | LD-Yes<br>N (%) | p value |
|------------------------------------------------|-----------------------|----------------|-----------------|---------|
| <i>Substance Use (past month)</i>              |                       |                |                 |         |
| IV drug use                                    | 88 (18)               | 53 (15)        | 35 (27)         | 0.003*  |
| Daily substance use (including alcohol)        | 143 (29)              | 91 (25)        | 52 (39)         | 0.002*  |
| Daily drug use (no alcohol)                    | 126 (25)              | 78 (21)        | 48 (36)         | 0.001*  |
| Daily hard drug use (no alcohol, no marijuana) | 74 (15)               | 45 (12)        | 29 (22)         | 0.009*  |
| Daily alcohol use                              | 26 (5)                | 17 (5)         | 9 (7)           | 0.367   |
| Polysubstance use (no alcohol)                 | 188 (38)              | 128 (35)       | 60 (45)         | 0.050+  |
| Age first drunk (<14 years)                    | 212 (45)              | 142 (42)       | 70 (56)         | 0.007*  |
| Age of first drug use (<14 years)              | 178 (40)              | 114 (35)       | 64 (52)         | 0.001*  |
| Sold drugs                                     | 50 (10)               | 32 (9)         | 18 (14)         | 0.140   |
| Shop-lifting                                   | 62 (13)               | 34 (10)        | 28 (21)         | 0.001*  |
| <i>Service Use (past 6 months)</i>             |                       |                |                 |         |
| Psychiatrist                                   | 134 (27)              | 109 (30)       | 25 (19)         | 0.013*  |
| Addiction counselor                            | 18 (4)                | 10 (3)         | 8 (6)           | 0.084+  |
| Seen by a health/social service provider       | 384 (78)              | 276 (76)       | 108 (82)        | 0.204   |
| Talked with a health/social service provider   | 112 (23)              | 69 (19)        | 43 (32)         | 0.002*  |
| ER visit (yes/no)                              | 281 (58)              | 204 (57)       | 77 (60)         | 0.594   |
| Multiple ER visits (three or more)             | 107 (22)              | 71 (20)        | 36 (28)         | 0.058+  |
| Ambulance (yes/no)                             | 195 (40)              | 147 (41)       | 48 (36)         | 0.381   |
| Police detention (yes/no)                      | 80 (19)               | 61 (19)        | 19 (17)         | 0.610   |
| Arrested (yes/no)                              | 172 (36)              | 124 (35)       | 48 (38)         | 0.603   |
| Multiple arrests (two or more)                 | 75 (16)               | 48 (14)        | 27 (21)         | 0.044+  |
| Court appearance                               | 172 (35)              | 127 (36)       | 45 (35)         | 0.932   |
| Justice program                                | 48 (11)               | 30 (9)         | 18 (16)         | 0.076+  |

<sup>1</sup> Each multivariable model was controlled for age (continuous), age of first homelessness age (continuous), gender, ethnicity (Aboriginals, Caucasian, Other), marital status (Single vs. Other) and language spoken in childhood home (English vs. Other).

\*\*p≤0.001

\*p≤0.05

+ p≤0.10

## Learning problems and disabilities

Table 4: Logistic regression analyses for socio-demographics, mental disorders, substance use and service utilization related outcomes based on early learning problems or disability (n=497).

| Outcome Variable                                          | Unadjusted OR (95% CI) | Adjusted OR (95% CI) <sup>1</sup> |
|-----------------------------------------------------------|------------------------|-----------------------------------|
| Age of first homelessness (<25 years) <sup>2</sup>        | 1.96 (1.30, 2.95)**    | 1.52 (0.95, 2.44)                 |
| Lifetime duration of homelessness (>3 years) <sup>#</sup> | 2.11 (1.40, 3.18)**    | 1.90 (1.19, 3.06)*                |
| Education level (Grade 8 or less)                         | 2.38 (1.43, 3.95)      | 2.20 (1.28, 3.81)                 |
| <i>Type of Mental Disorder</i>                            |                        |                                   |
| Major Depressive Episode                                  | 1.64 (1.10, 2.45)*     | 1.64 (1.07, 2.52)*                |
| Manic or Hypomanic Episode                                | 1.55 (0.96, 2.49)      | 1.51 (0.91, 2.51)                 |
| Panic Disorder                                            | 2.02 (1.28, 3.19)*     | 1.86 (1.15, 3.02)*                |
| Alcohol dependence                                        | 1.67 (1.07, 2.59)*     | 1.69 (1.06, 2.69)*                |
| Two or more mental disorders                              | 2.10 (1.40, 3.15)**    | 2.06 (1.33, 3.19)**               |
| High suicidality                                          | 1.89 (1.16, 3.09)*     | 1.93 (1.15, 3.24)*                |
| Less severe cluster of mental disorders                   | 2.10 (1.38, 3.16)**    | 1.95 (1.25, 3.04)*                |
| <i>Physical Health</i>                                    |                        |                                   |
| Blood-borne infectious diseases                           | 1.76 (1.16, 2.66)*     | 1.75 (1.11, 2.74)*                |
| Migraine                                                  | 2.57 (1.70, 3.90)**    | 2.50 (1.62, 3.88)**               |
| Seizures                                                  | 2.11 (1.23, 3.61)*     | 2.23 (1.25, 4.00)*                |
| Multiple physical illness                                 | 1.71 (0.98, 2.99)      | 2.16 (1.16, 4.02)*                |
| Overall health (fair/poor)                                | 1.57 (1.06, 2.35)*     | 1.90 (1.24, 2.92)*                |
| History of head injury                                    | 2.33 (1.51, 3.59)*     | 2.23 (1.42, 3.50)*                |
| <i>Substance Use</i>                                      |                        |                                   |
| IV drug use                                               | 2.07 (1.28, 3.36)*     | 2.01 (1.19, 3.39)*                |
| Daily drug use (no alcohol)                               | 2.07 (1.34, 3.19)**    | 1.77 (1.12, 2.80)*                |
| Daily drug use (no alcohol, no marijuana)                 | 1.98 (1.18, 3.31)*     | 1.79 (1.03, 3.11)*                |
| Daily substance use (including alcohol)                   | 1.93 (1.26, 2.94)*     | 1.70 (1.09, 2.65)*                |
| Poly-substance use (no alcohol)                           | 1.50 (1.00, 2.24)      | 1.27 (0.82, 1.97)                 |
| Age first drunk (<14 years)                               | 1.75 (1.16, 2.65)*     | 1.37 (0.88, 2.14)                 |
| Age of first drug use (<14 years)                         | 1.98 (1.30, 3.02)**    | 1.60 (1.02, 2.50)*                |
|                                                           | 2.53 (1.46, 4.36)**    | 2.31 (1.30, 4.11)*                |
| <i>Service Use</i>                                        |                        |                                   |
| Talked with a health/social service provider              | 1.99 (1.30, 3.11)*     | 2.00 (1.25, 3.21)*                |
| Multiple ER visits (three or more) <sup>#</sup>           | 1.12 (0.74, 1.68)      | 1.04 (0.67, 1.60)                 |
| Multiple arrests (two or more) <sup>#</sup>               | 1.70 (1.01, 2.87)*     | 1.65 (0.95, 2.86)                 |
| Justice program                                           | 1.76 (0.94, 3.92)      | 1.34 (0.59, 3.08)                 |

<sup>1</sup> Each multivariable model was controlled for age (continuous), age of first homelessness age (continuous), gender, ethnicity (Aboriginal, Caucasian, Other), marital status (Single, Other) and language spoken in the childhood home (English, Other).



1  
2  
3  
4  
5  
6 Learning problems and disabilities  
7

8 <sup>2</sup> This multivariable model was controlled for age (continuous), gender, ethnicity  
9 (Aboriginal, Caucasian, Other), marital status (Single, Other), and language spoken in the  
10 childhood home (English, Other).

11 # Dichotomized based on median value.

12 \*\*p≤0.001

13 \*p≤0.05  
14  
15  
16  
17  
18  
19  
20  
21  
22  
23  
24  
25  
26  
27  
28  
29  
30  
31  
32  
33  
34  
35  
36  
37  
38  
39  
40  
41  
42  
43  
44  
45  
46  
47  
48  
49  
50  
51  
52  
53  
54  
55  
56  
57  
58  
59  
60
